# Supplementary material for: Step-wise changes in the excited state lifetime of [Eu(D2O)9]3+ and [Eu(DOTA)(D2O)]− as a function of the number of inner-sphere O–H oscillators
Source: Royal Society of Chemistry journal article supplement (doi:10.1039/d4dt00744a), 2024-01-01
Supplement: d4dt00744a1.pdf [file d4dt00744a1.pdf]

# Supporting Information for: Step-Wise Changes in the Excited State Lifetime of $[\text{Eu}(\text{D}_2\text{O})_9]^{3+}$ and $[\text{Eu}(\text{DOTA})(\text{D}_2\text{O})]^-$ as a Function of the Number of Inner-Sphere O-H Oscillators

## Contents

|                                                                                                         |    |
|---------------------------------------------------------------------------------------------------------|----|
| $[\text{Eu}(\text{H}_2\text{O})_9]^{3+} / [\text{Eu}(\text{D}_2\text{O})_9]^{3+}$ .....                 | 2  |
| 293 K.....                                                                                              | 2  |
| 77 K.....                                                                                               | 7  |
| $[\text{Eu}(\text{DOTA})(\text{H}_2\text{O})]^- / [\text{Eu}(\text{DOTA})(\text{D}_2\text{O})]^-$ ..... | 21 |
| 293 K.....                                                                                              | 21 |
| 77 K.....                                                                                               | 25 |

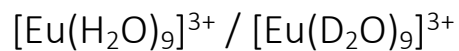

293 K

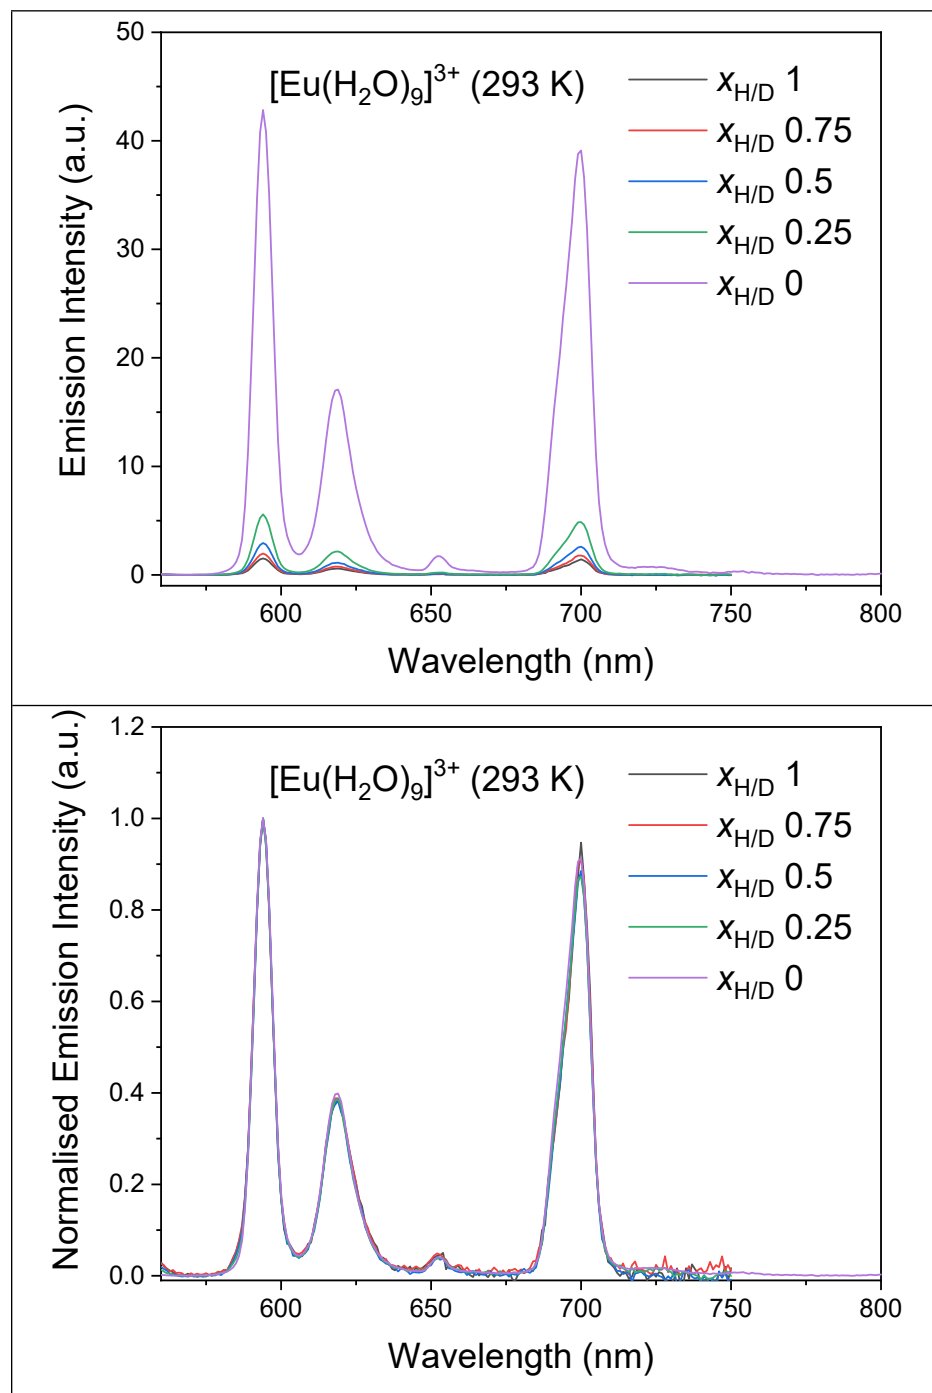

**Figure S1.** Emission spectra (top) and normalised emission spectra (bottom) of  $[\text{Eu}(\text{H}_2\text{O})_9]^{3+}$  in  $\text{H}_2\text{O}/\text{D}_2\text{O}$  mixtures in solution at 293 K. Emission slits were kept at 5 nm.

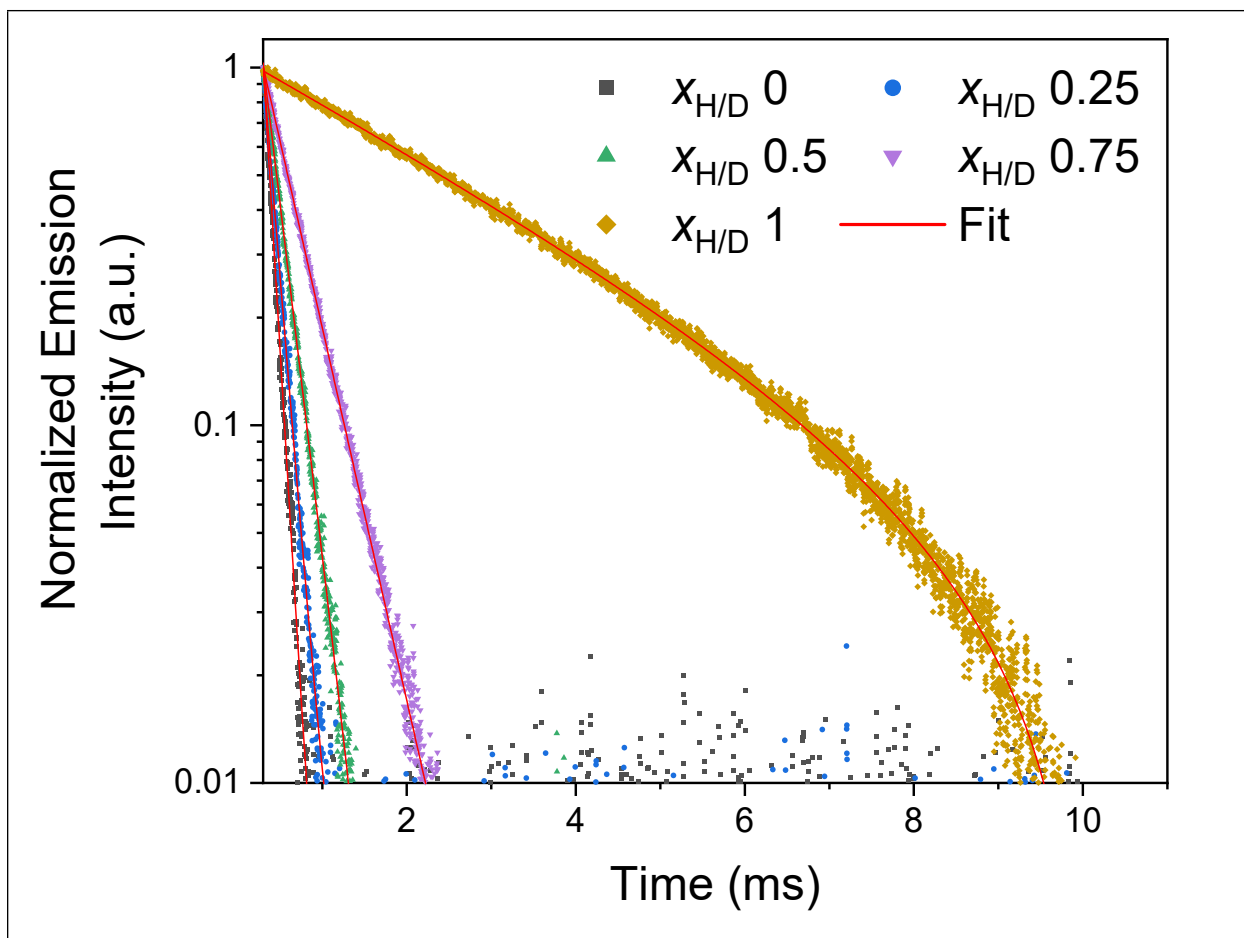

**Figure S2.** Emission decay traces of  $[\text{Eu}(\text{H}_2\text{O})_9]^{3+}$  in  $\text{H}_2\text{O}/\text{D}_2\text{O}$  mixtures in solution at 293 K. Data has been fitted to mono-exponential decay function.

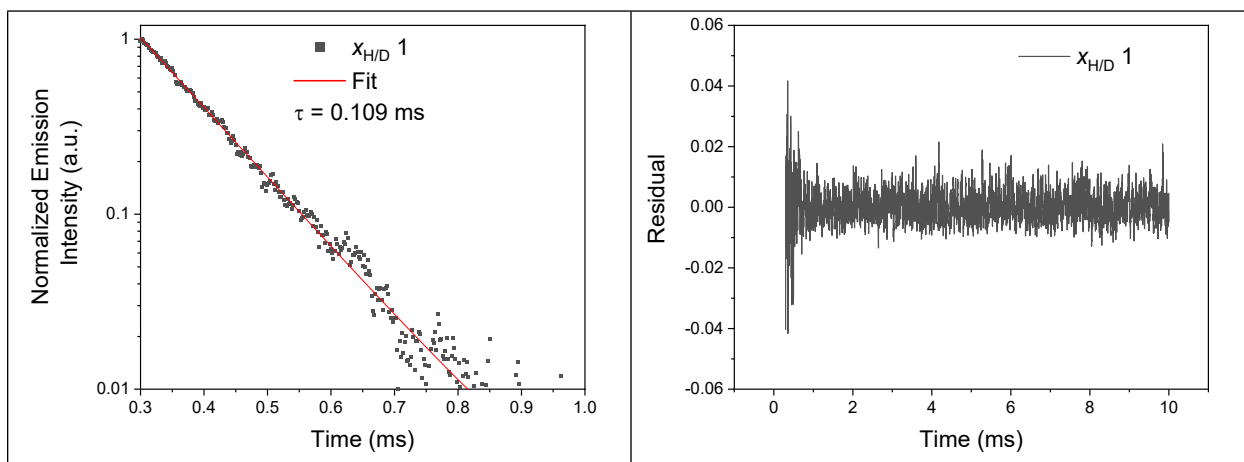

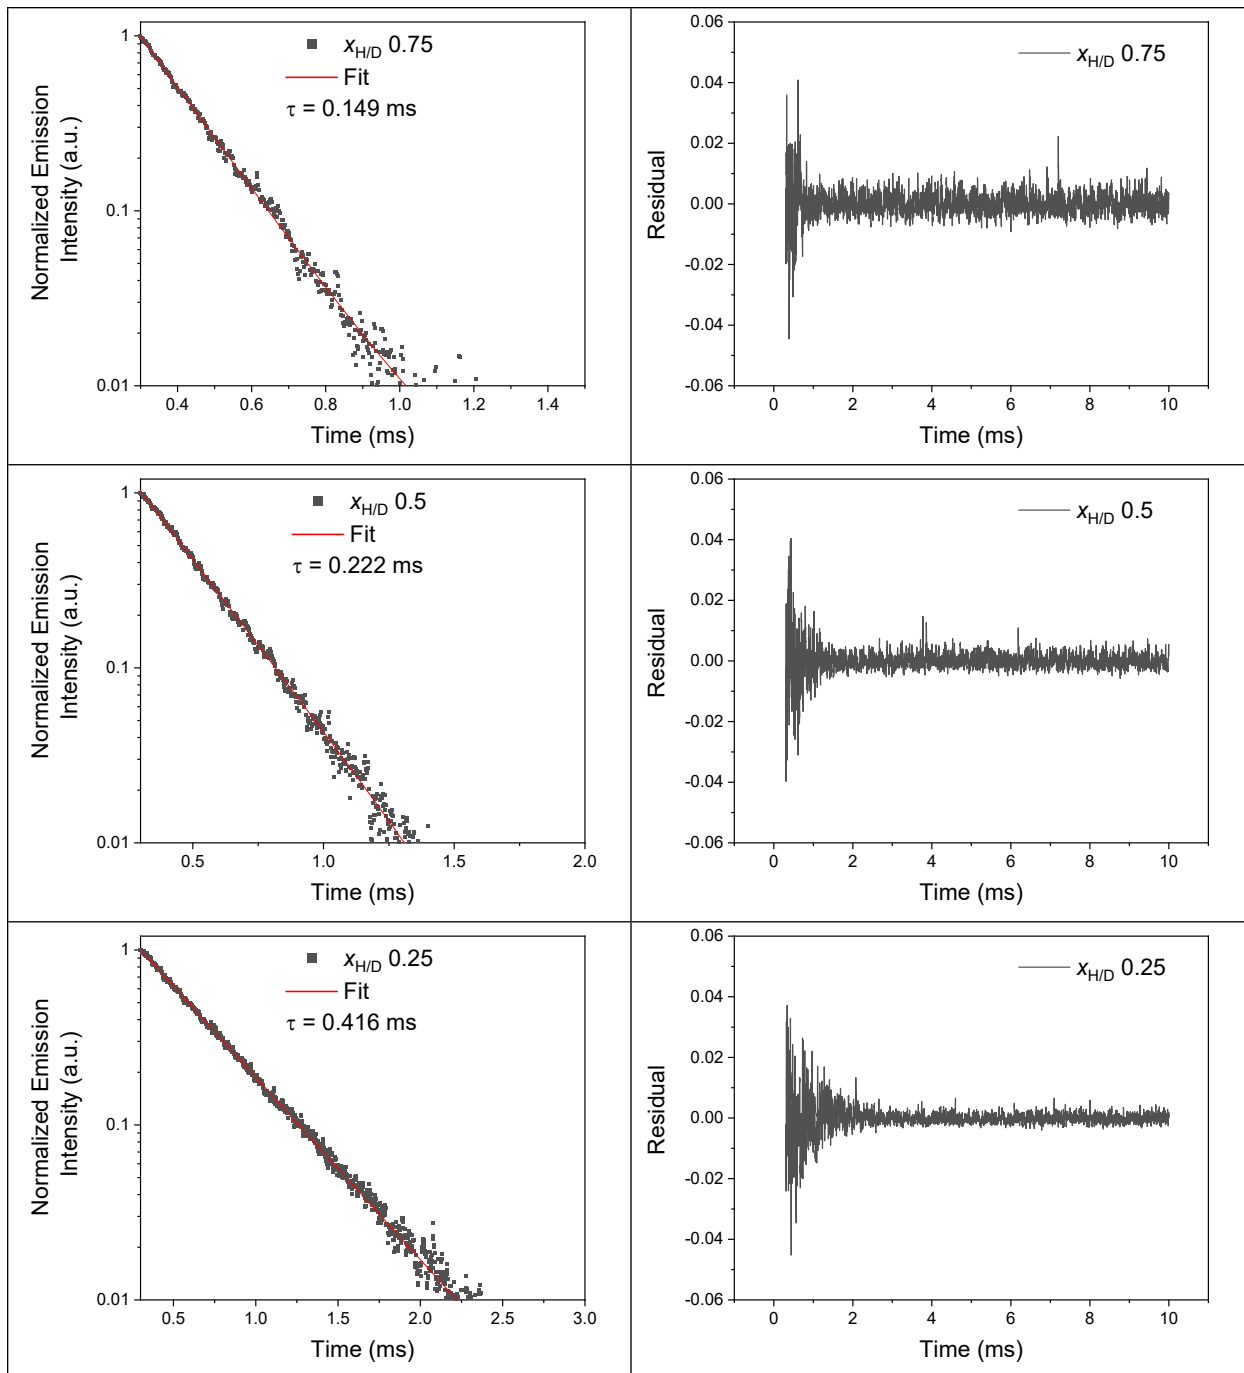

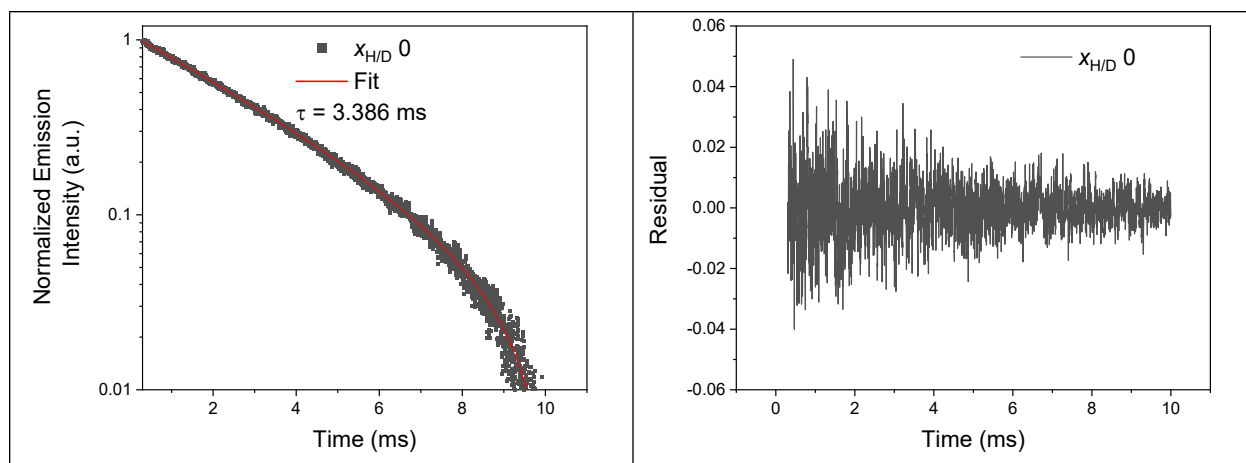

**Figure S3.** (left) Individual emission decay traces of  $[\text{Eu}(\text{H}_2\text{O})_9]^{3+}$  in  $\text{H}_2\text{O}/\text{D}_2\text{O}$  mixtures in solution at 293 K. Data has been fitted to mono-exponential decay function. (right) Residual between fit and data of fits.

**Table S1.** Fit parameters for  $[\text{Eu}(\text{H}_2\text{O})_9]^{3+}$  at 293 K.

| $x_{\text{H/D}}$ | A                        | $\tau$                     |
|------------------|--------------------------|----------------------------|
| 1                | $16.0 \pm 0.10$          | $0.109 \pm 2.2\text{E-}4$  |
| 0.75             | $7.45 \pm 0.025$         | $0.149 \pm 2.0\text{E-}4$  |
| 0.5              | $3.98 \pm 0.0075$        | $0.222 \pm 2.2 \text{E-}4$ |
| 0.25             | $2.07 \pm 0.0021$        | $0.416 \pm 3.3\text{E-}4$  |
| 0                | $1.13 \pm 5.1\text{E-}4$ | $3.386 \pm 0.0048$         |

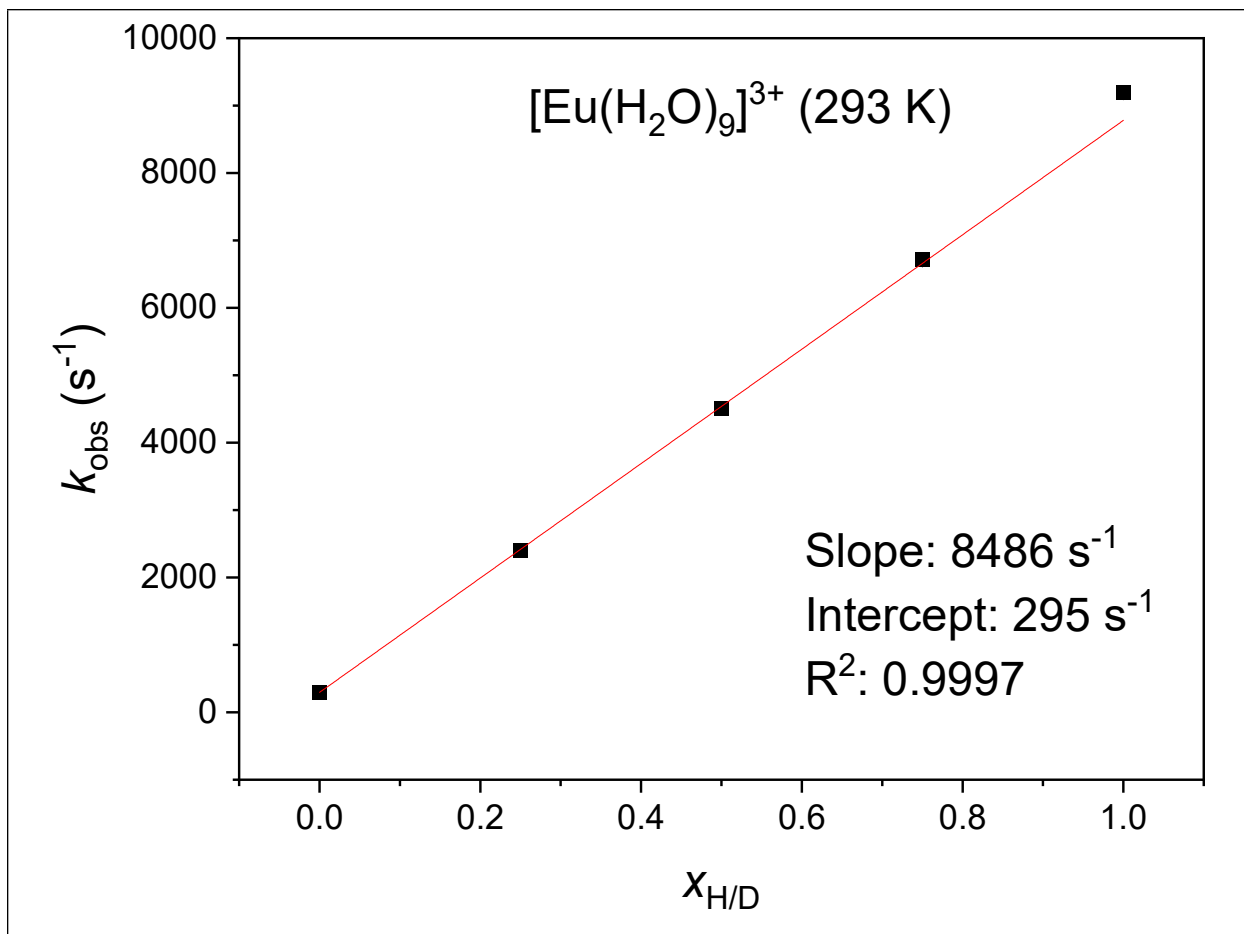

**Figure S4.** Observed rate of deactivation ( $k_{\text{obs}}$ ) of the <sup>5</sup>D<sub>0</sub> state of [Eu(H<sub>2</sub>O)<sub>9</sub>]<sup>3+</sup> in H<sub>2</sub>O/D<sub>2</sub>O mixtures in solution at 293 K. Data has been fitted with linear function

77 K

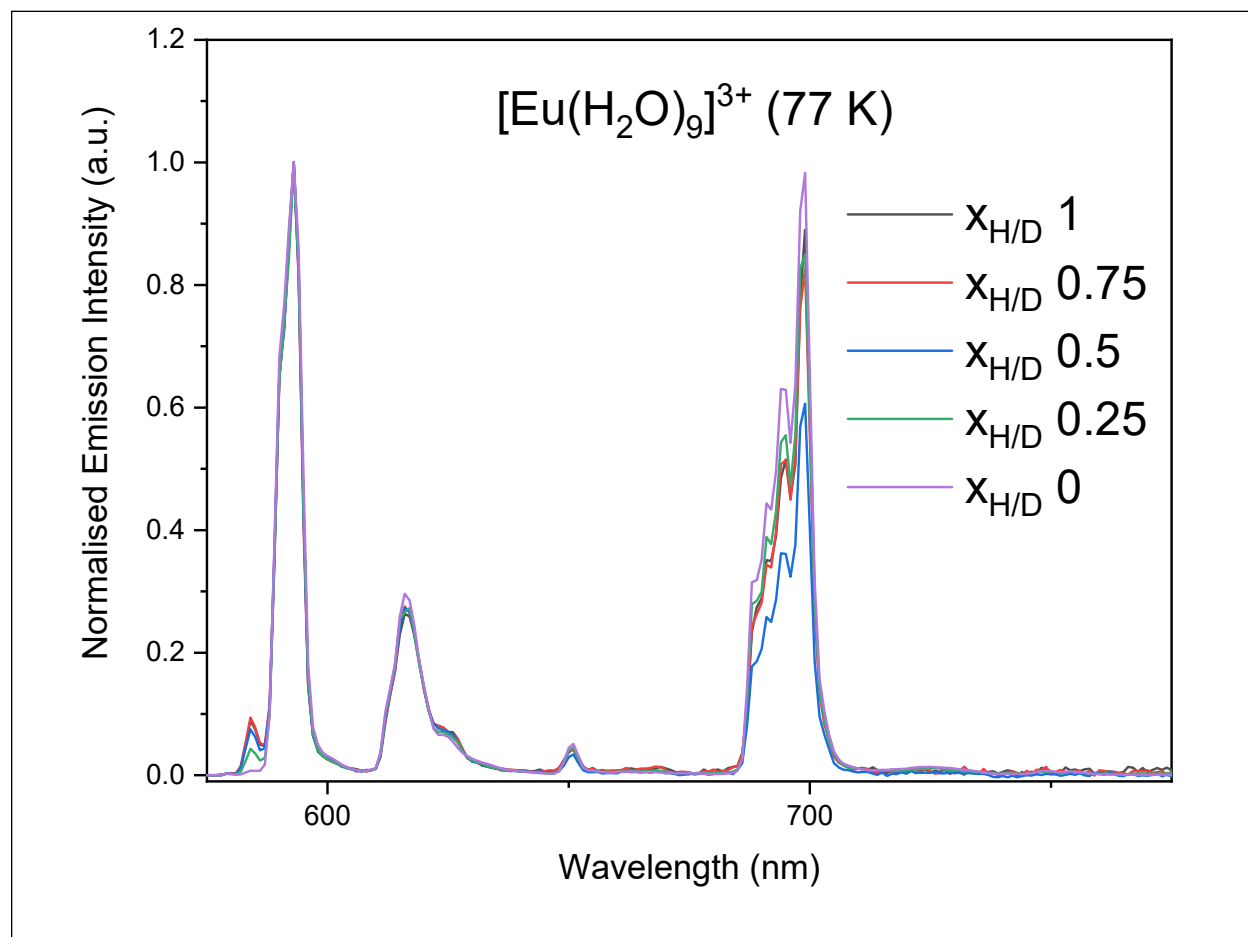

**Figure S5.** Normalised emission spectra (bottom) of [Eu(H<sub>2</sub>O)<sub>9</sub>]<sup>3+</sup> at in H<sub>2</sub>O/D<sub>2</sub>O mixtures in solution at 293 K. Emission slits were kept at 2 nm.

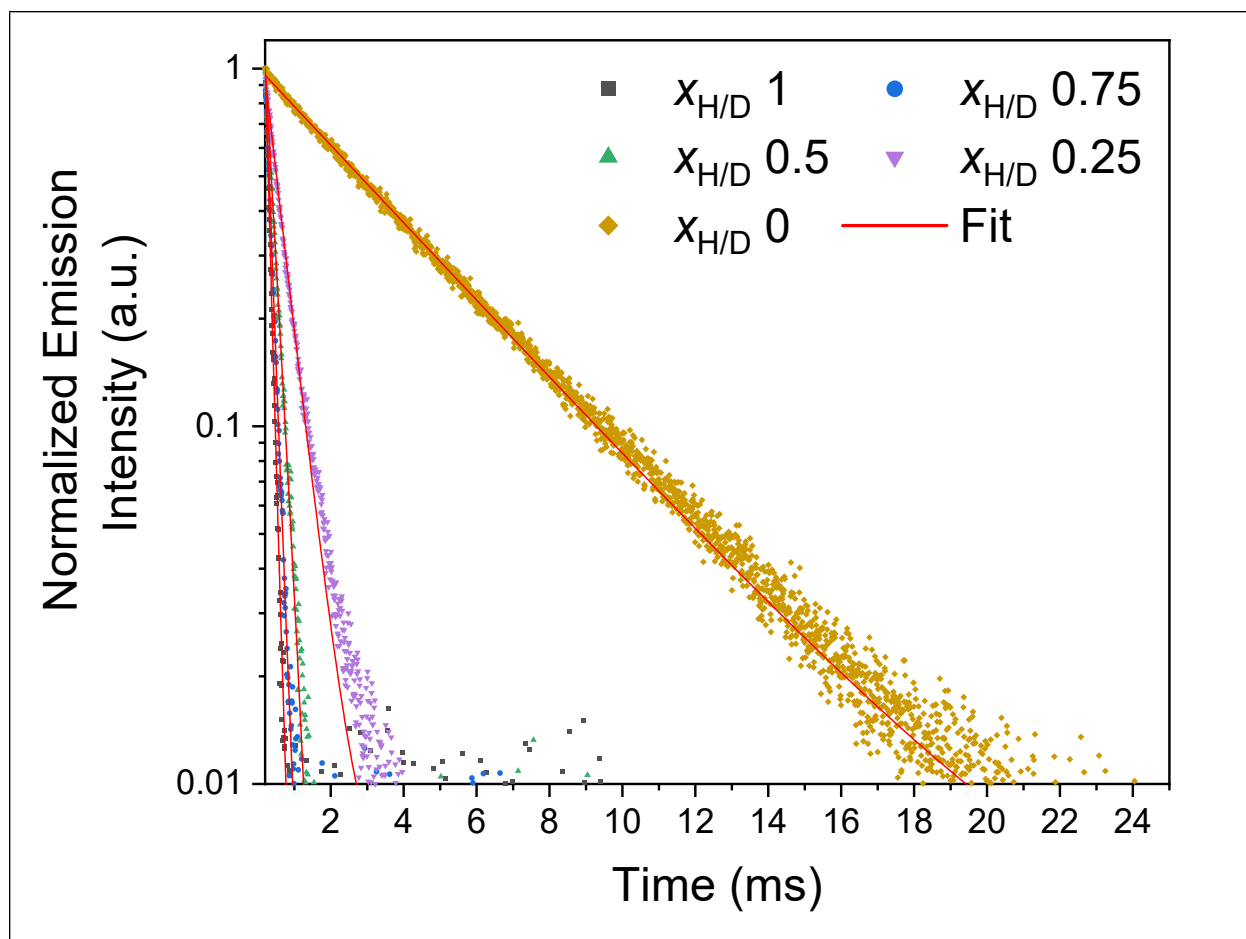

**Figure S6.** Emission decay traces of  $[\text{Eu}(\text{H}_2\text{O})_9]^{3+}$  in  $\text{H}_2\text{O}/\text{D}_2\text{O}$  mixtures in frozen solution at 77 K. Data has been fitted to mono-exponential decay function.

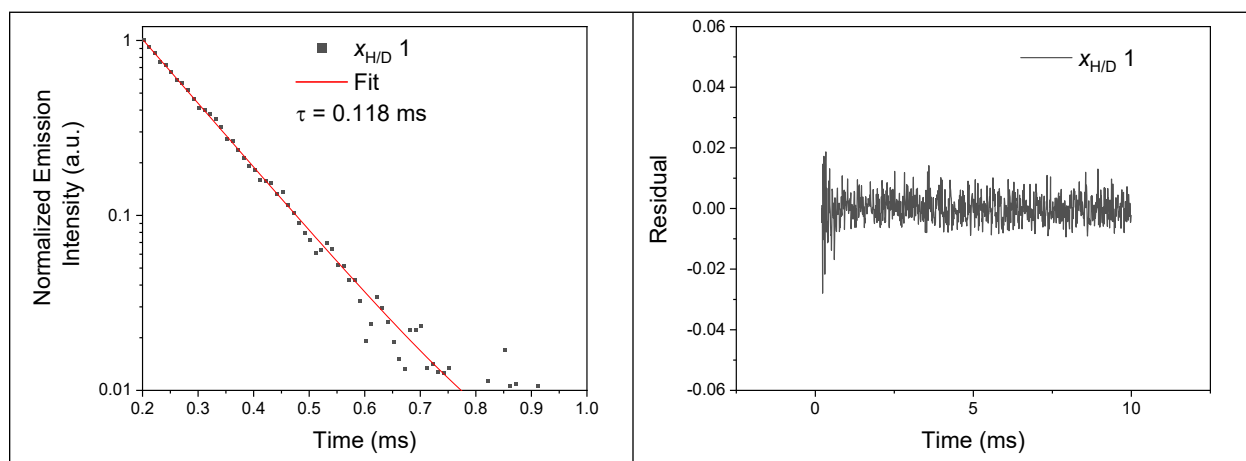



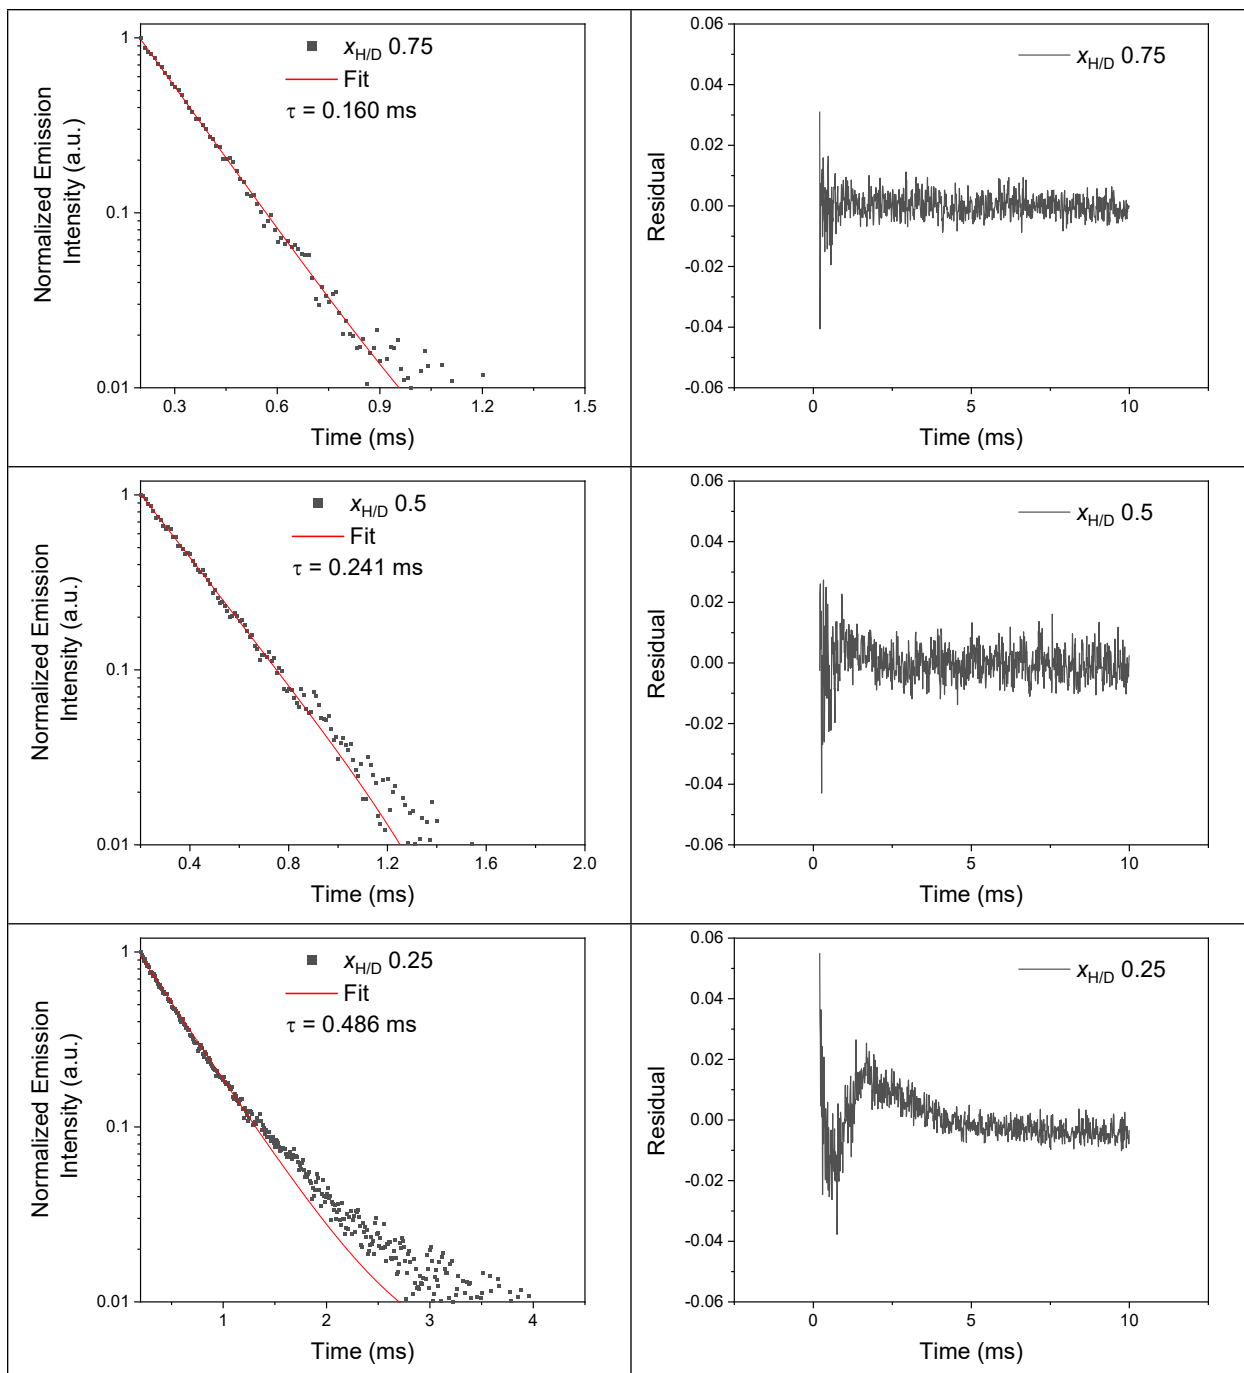

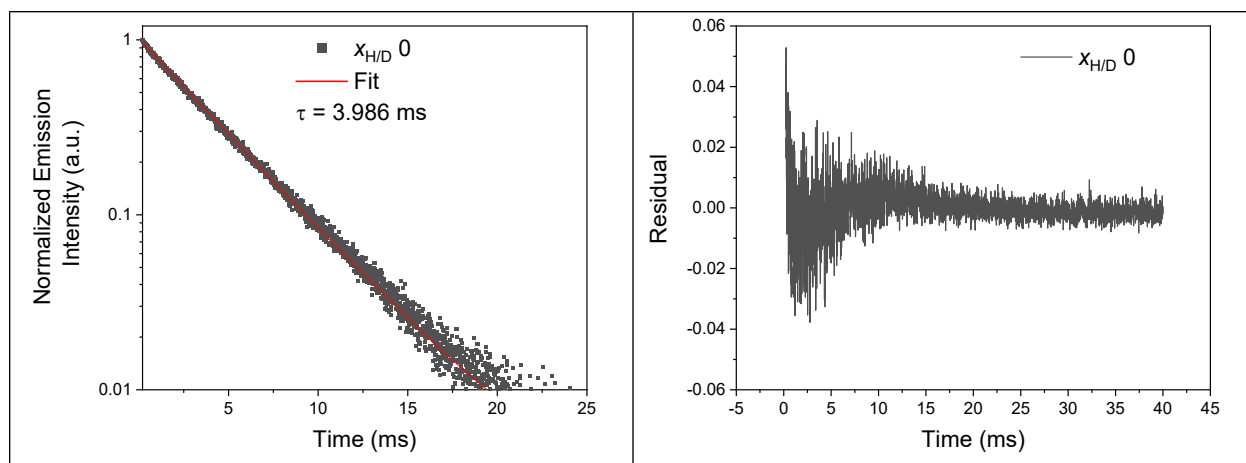

**Figure S7.** (left) Individual emission decay traces of  $[\text{Eu}(\text{H}_2\text{O})_9]^{3+}$  in  $\text{H}_2\text{O}/\text{D}_2\text{O}$  mixtures in frozen solution at 77 K. Data has been fitted to mono-exponential decay functions. (right) Residual between data and fit.

**Table S2.** Fit parameters for  $[\text{Eu}(\text{H}_2\text{O})_9]^{3+}$  at 77 K.

| $x_{\text{H/D}}$ | A                        | $\tau$                    |
|------------------|--------------------------|---------------------------|
| 1                | $5.50 \pm 0.044$         | $0.118 \pm 4.3\text{E-}4$ |
| 0.75             | $3.42 \pm 0.018$         | $0.160 \pm 4.8\text{E-}4$ |
| 0.5              | $2.33 \pm 0.011$         | $0.241 \pm 8.4\text{E-}4$ |
| 0.25             | $1.43 \pm 0.0050$        | $0.486 \pm 0.0017$        |
| 0                | $1.01 \pm 7.1\text{E-}4$ | $3.986 \pm 0.0044$        |

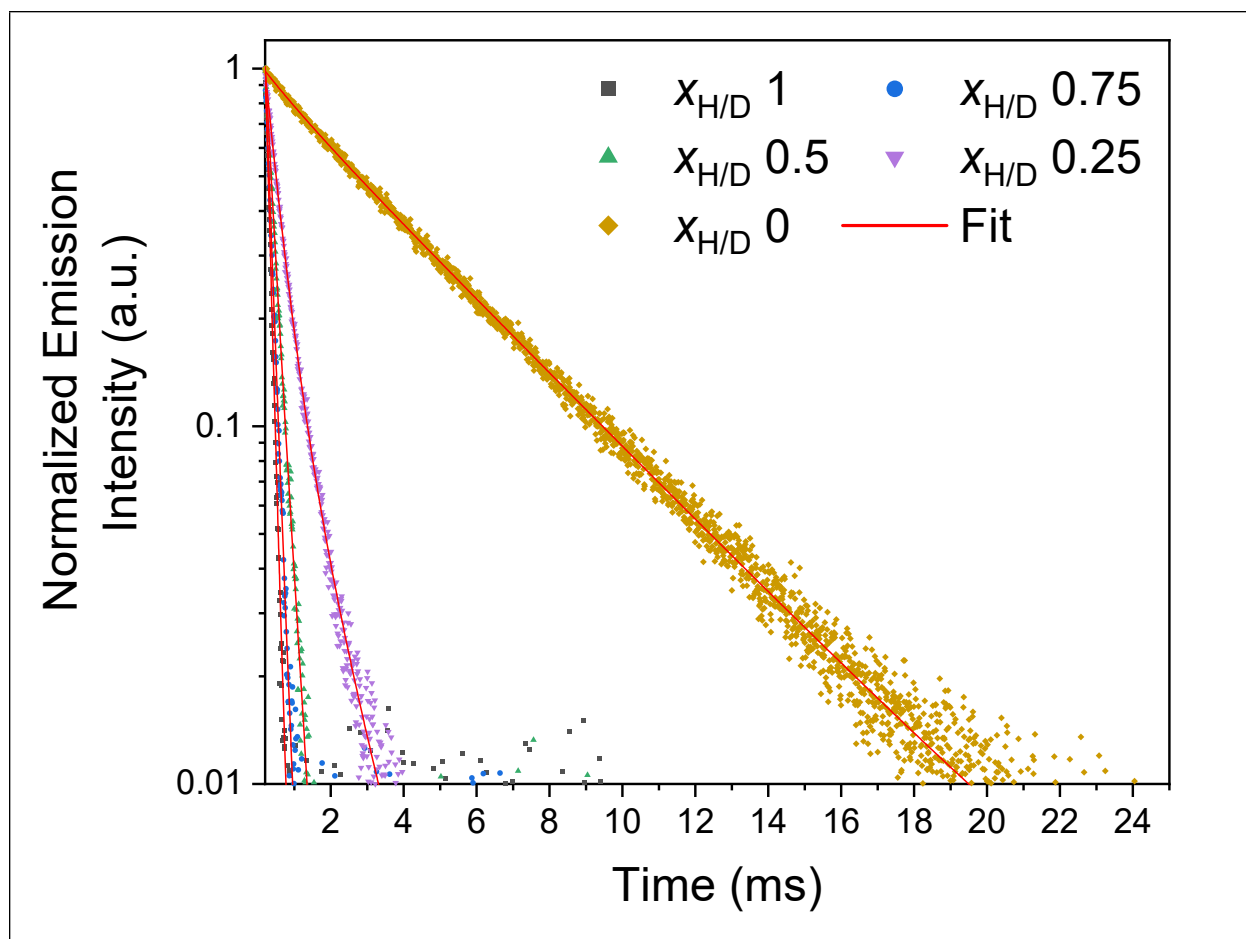

**Figure S8.** Emission decay traces of  $[\text{Eu}(\text{H}_2\text{O})_9]^{3+}$  in  $\text{H}_2\text{O}/\text{D}_2\text{O}$  mixtures in frozen solution at 77 K. Data has been fitted to mono-exponential ( $x_{\text{H/D}} = 1, 0.75$ ) or bi-exponential ( $x_{\text{H/D}} = 0.5-0$ ) decay functions.

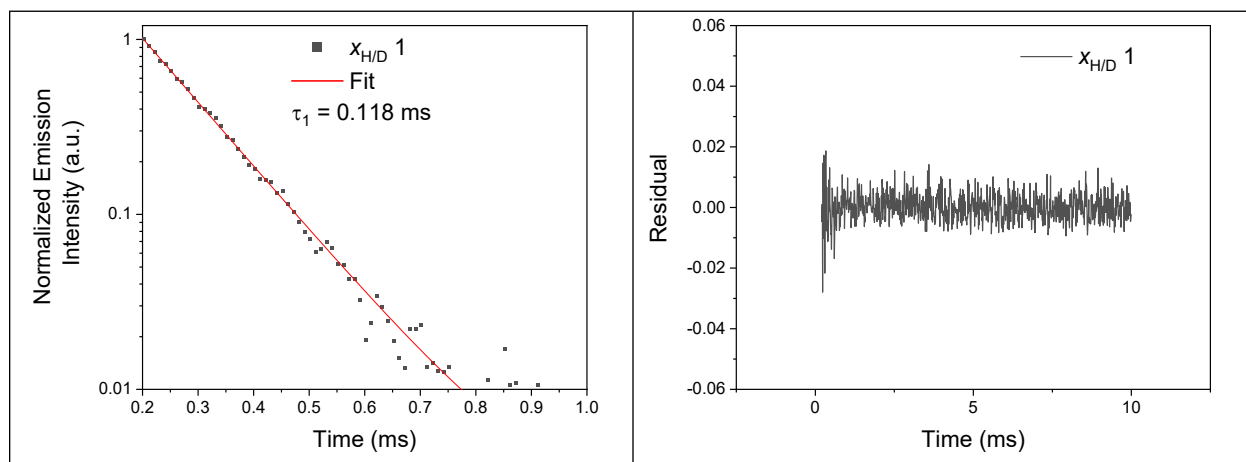

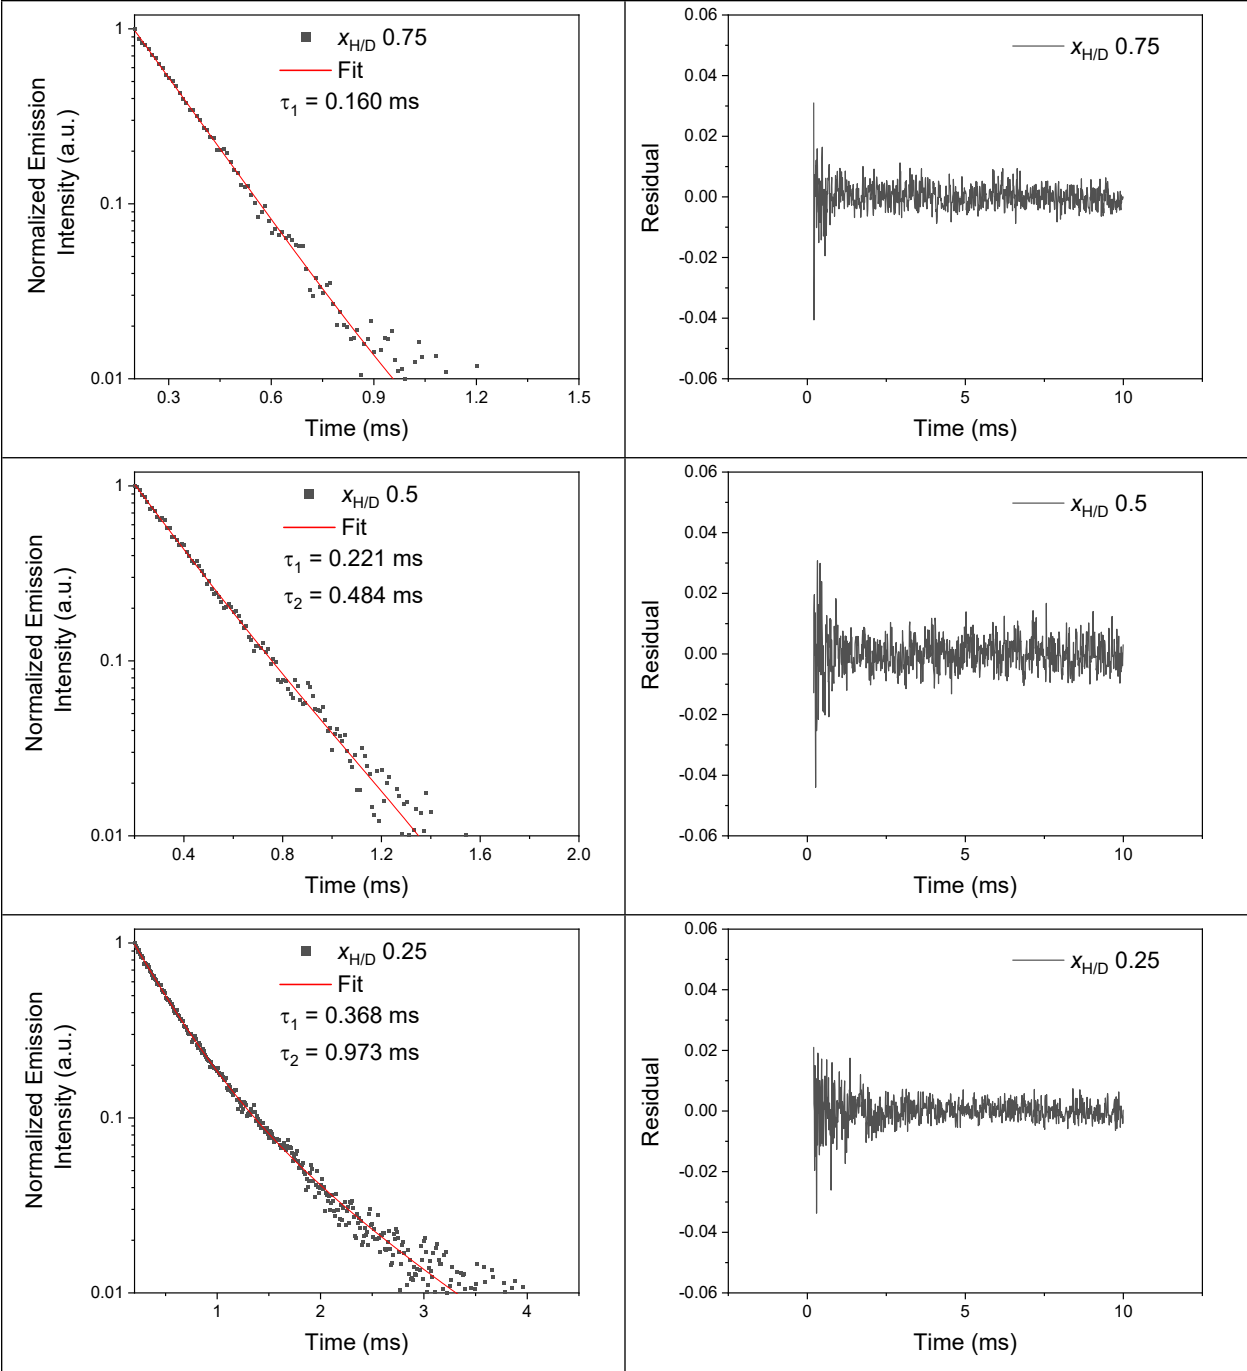

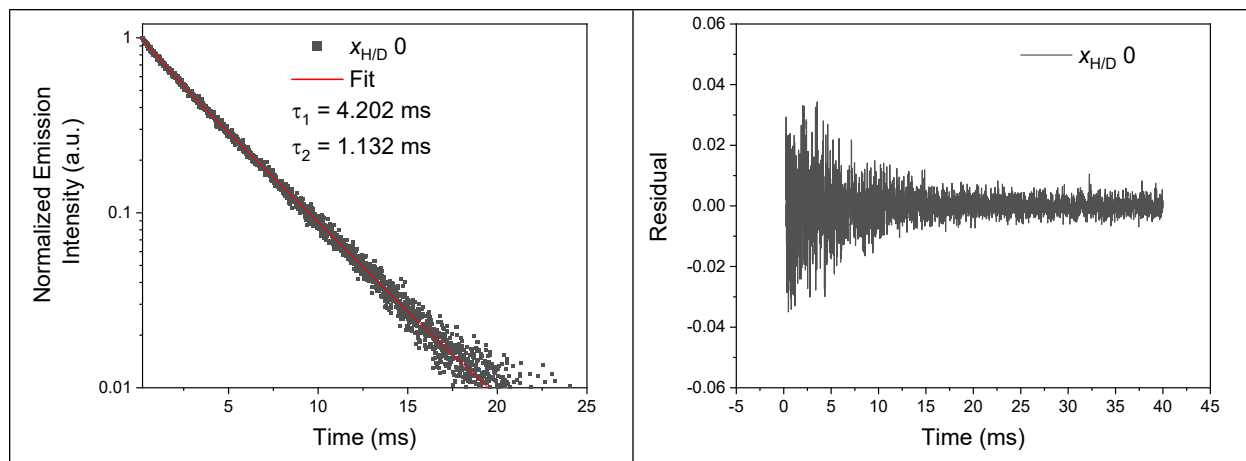

**Figure S9.** (left) Individual emission decay traces of  $[\text{Eu}(\text{H}_2\text{O})_9]^{3+}$  in  $\text{H}_2\text{O}/\text{D}_2\text{O}$  mixtures in frozen solution at 77 K. Data has been fitted to mono-exponential ( $x_{\text{H}/\text{D}} = 1, 0.75$ ) or bi-exponential ( $x_{\text{H}/\text{D}} = 0.5-0$ ) decay functions. (right) Residual of fit and data.

**Table S3.** Fit parameters for  $[\text{Eu}(\text{H}_2\text{O})_9]^{3+}$  at 77 K.

| $x_{\text{H}/\text{D}}$ | $A_1$              | $\tau_1$                  | $A_2$              | $\tau_2$          |
|-------------------------|--------------------|---------------------------|--------------------|-------------------|
| 1                       | $5.50 \pm 0.044$   | $0.118 \pm 4.3\text{E-}4$ | -                  | -                 |
| 0.75                    | $3.42 \pm 0.018$   | $0.160 \pm 4.8\text{E-}4$ | -                  | -                 |
| 0.5                     | $2.32 \pm 0.06$    | $0.221 \pm 0.0060$        | $0.136 \pm 0.086$  | $0.484 \pm 0.097$ |
| 0.25                    | $1.31 \pm 0.017$   | $0.368 \pm 0.0051$        | $0.272 \pm 0.0021$ | $0.973 \pm 0.032$ |
| 0                       | $0.104 \pm 0.0042$ | $1.132 \pm 0.062$         | $0.940 \pm 0.0048$ | $4.201 \pm 0.013$ |

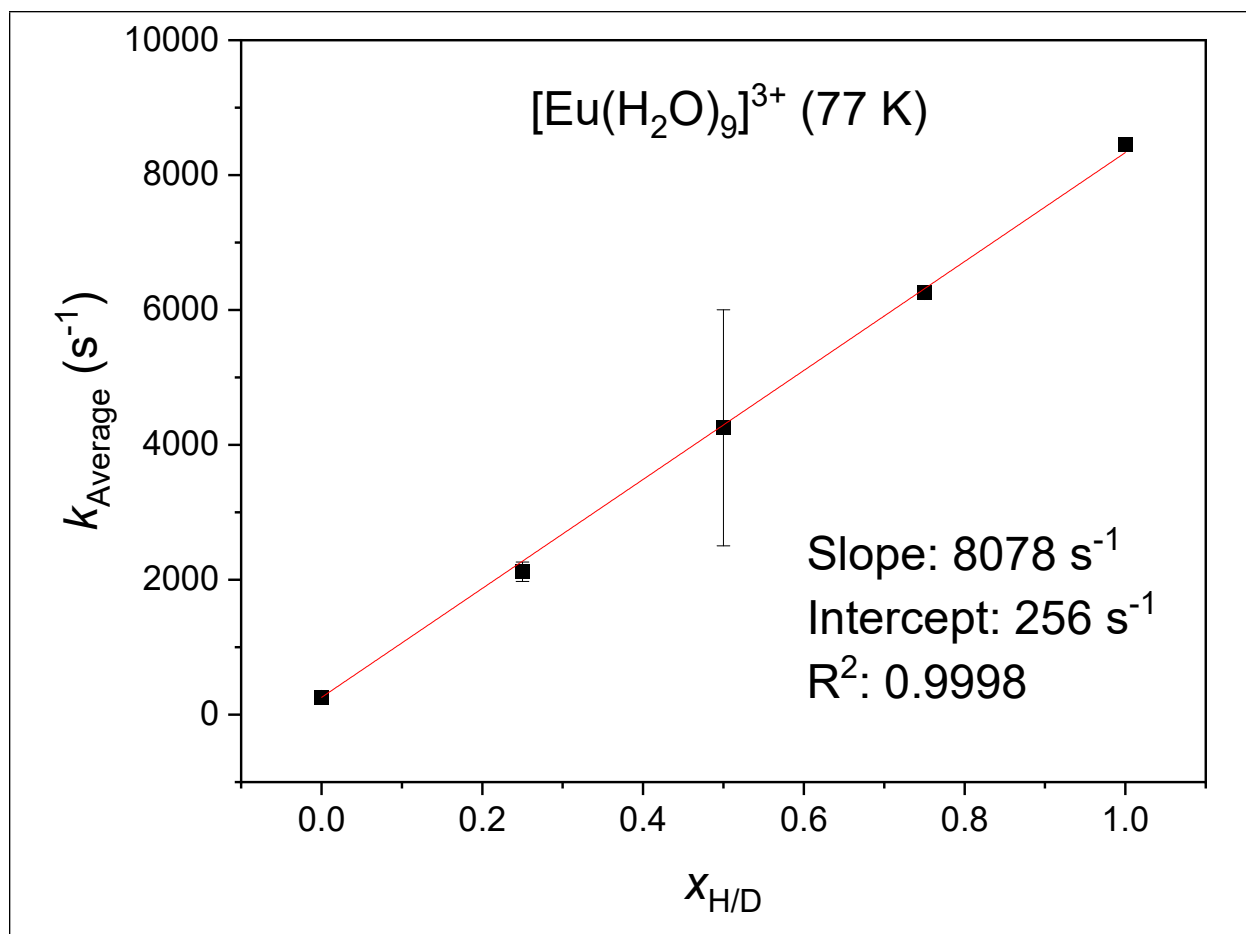

**Figure S10.** Average rate of deactivation ( $k_{\text{Average}}$ ) of the  $^5\text{D}_0$  state of  $[\text{Eu}(\text{H}_2\text{O})_9]^{3+}$  in  $\text{H}_2\text{O}/\text{D}_2\text{O}$  mixtures in frozen solution at 77 K obtained from multicomponent fits. Data has been fitted with linear function.

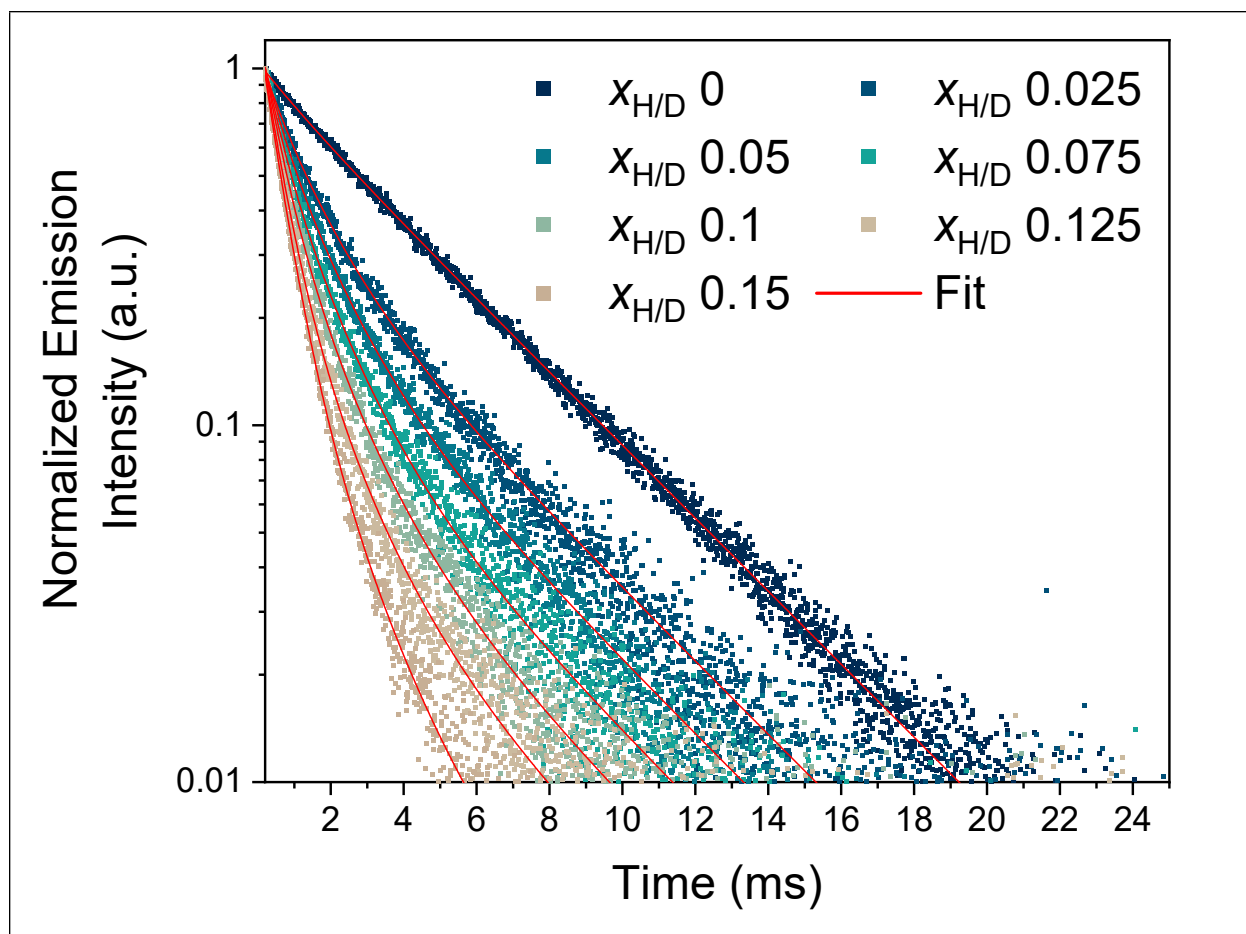

**Figure S11.** Emission decay traces of  $[\text{Eu}(\text{H}_2\text{O})_9]^{3+}$  in  $\text{H}_2\text{O}/\text{D}_2\text{O}$  mixtures in frozen solution at 77 K. Data has been fitted to tri-exponential decay using a global model.

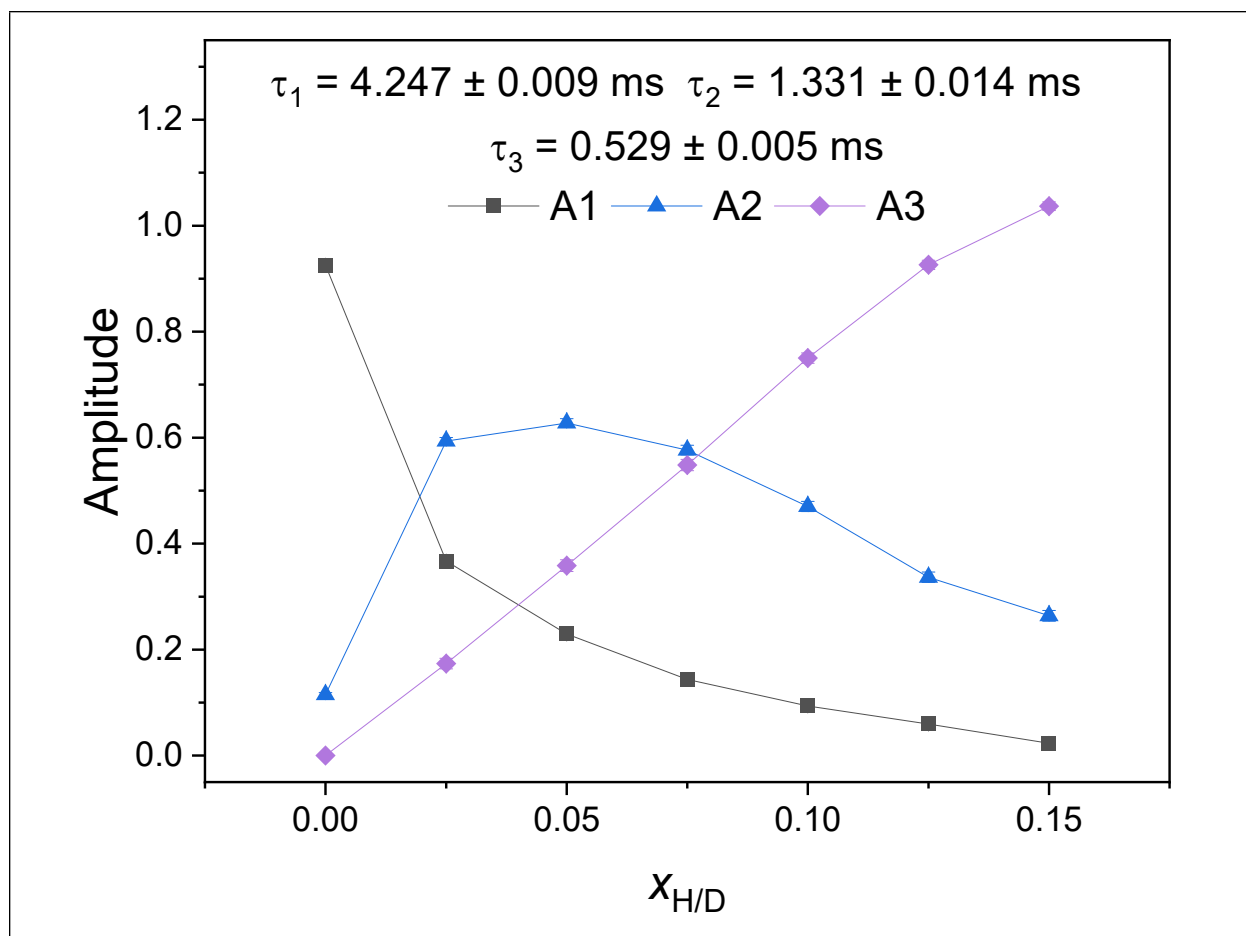

Figure S12. Amplitudes from global fit of  $[\text{Eu}(\text{H}_2\text{O})_9]^{3+}$  in mixtures of  $\text{H}_2\text{O}/\text{D}_2\text{O}$  in frozen solution at 77 K.



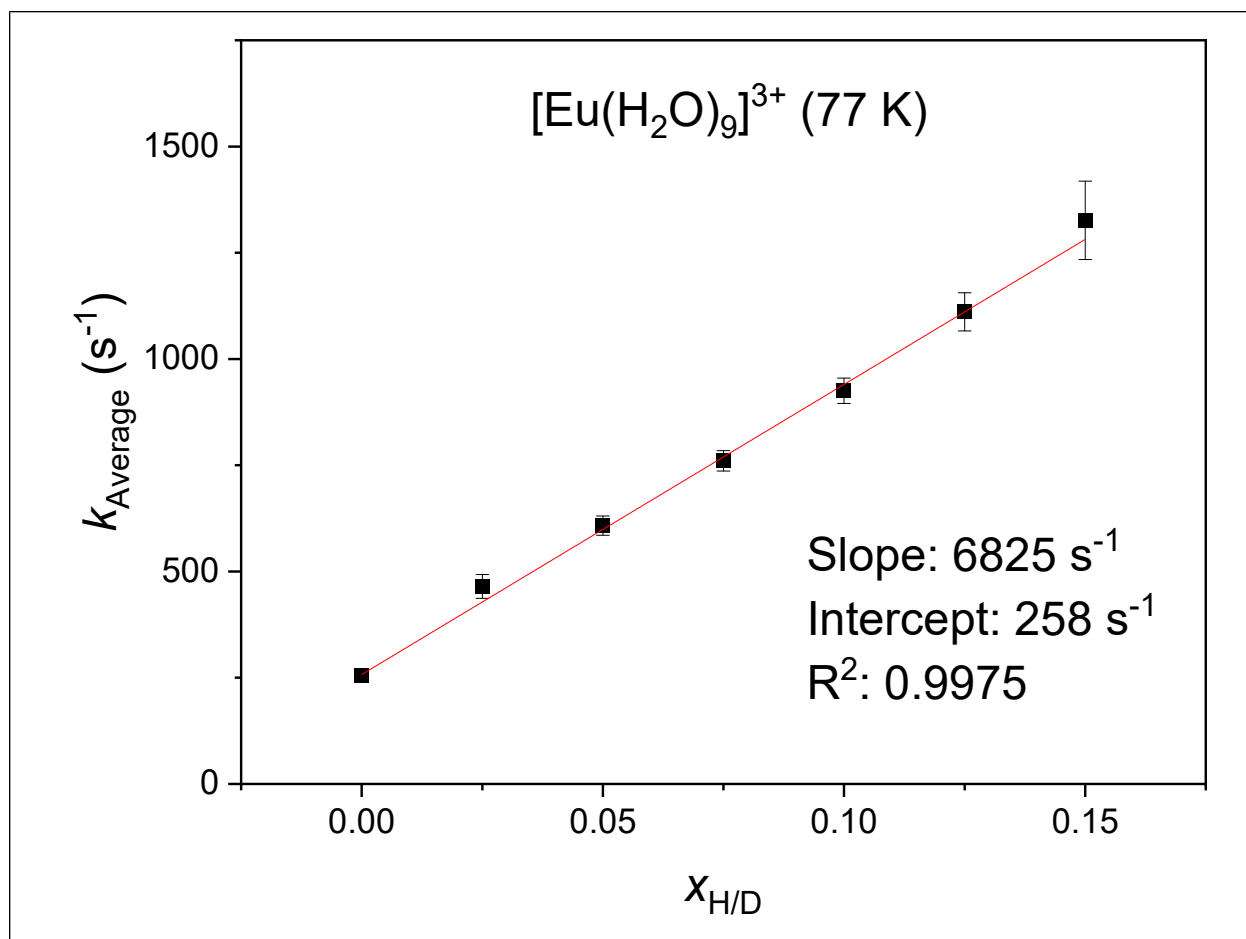

**Figure S13.** Average rate of deactivation ( $k_{\text{Average}}$ ) of the  $^5\text{D}_0$  state of  $[\text{Eu}(\text{H}_2\text{O})_9]^{3+}$  in  $\text{H}_2\text{O}/\text{D}_2\text{O}$  mixtures in frozen solution at 77 K obtained from a tri-exponential global fit. Data has been fitted with a linear function.

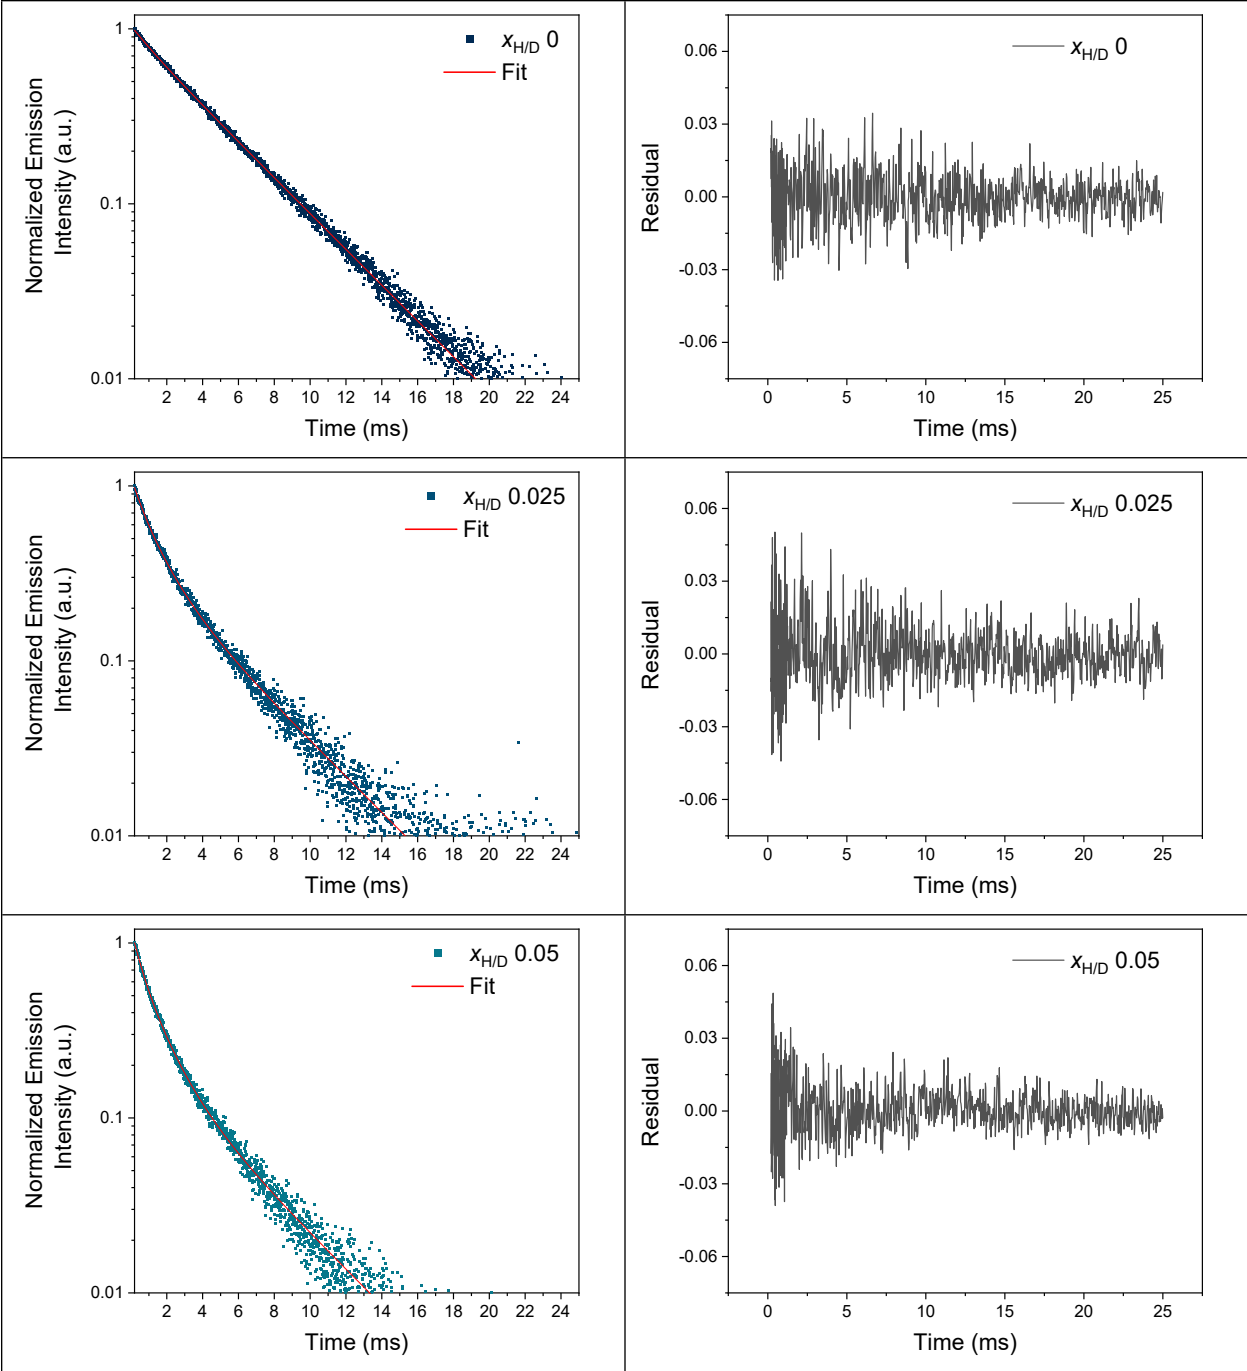

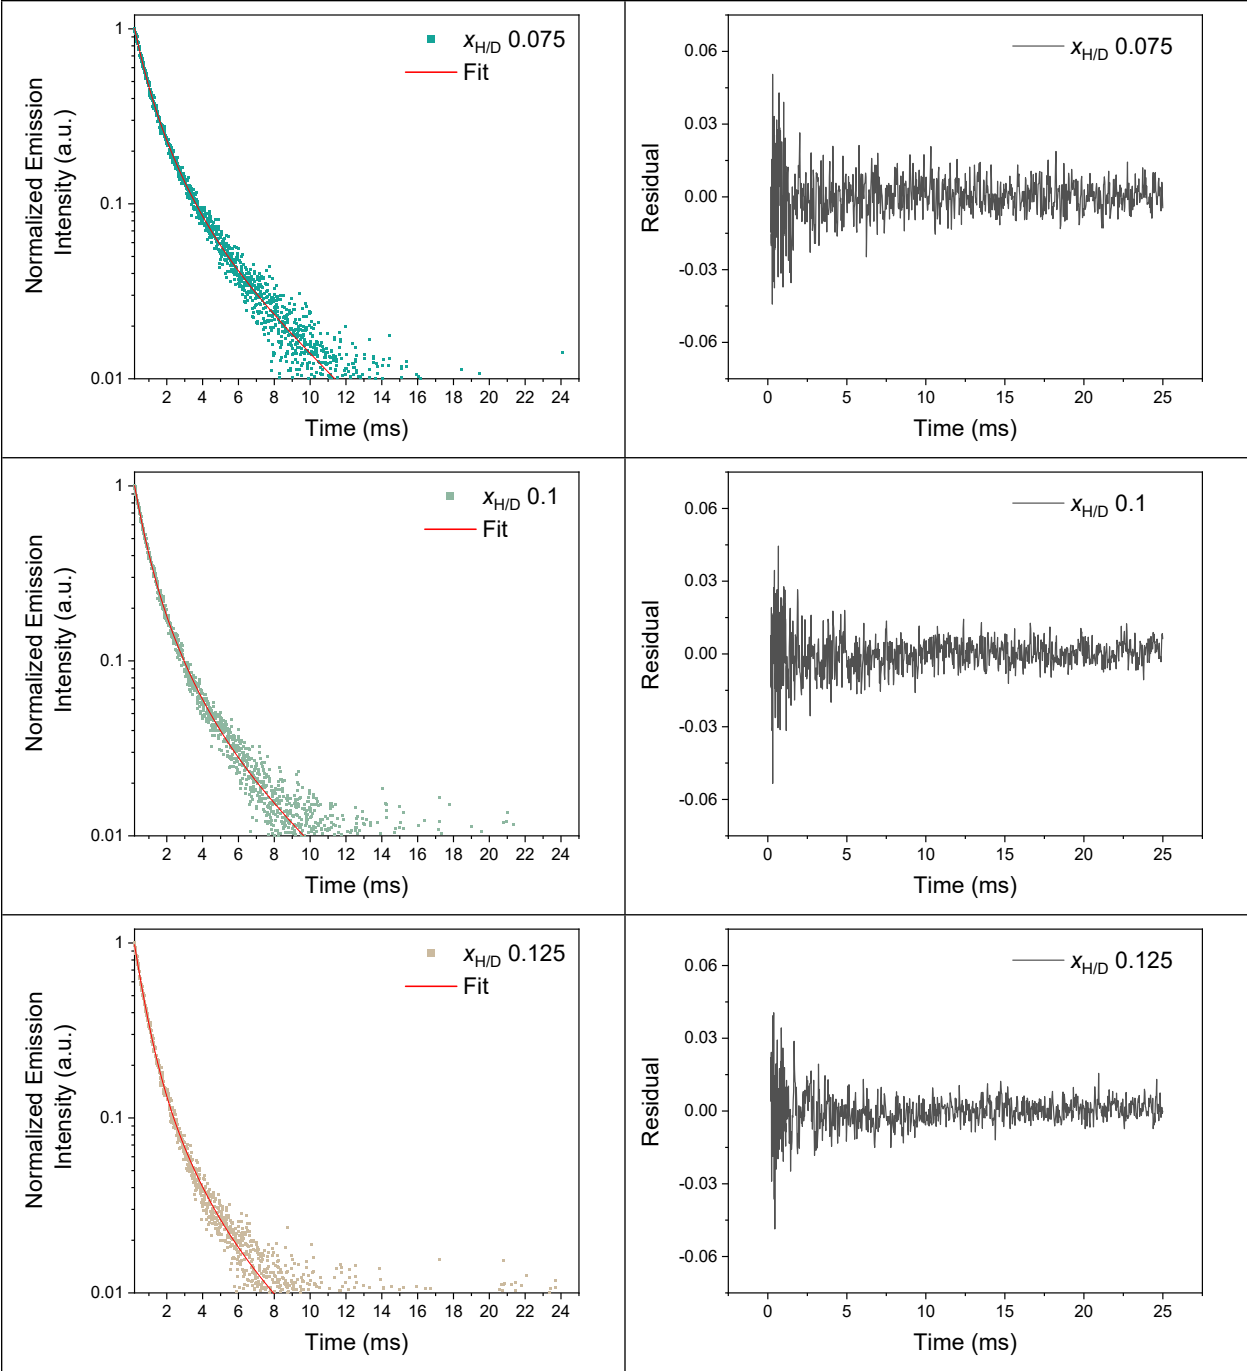

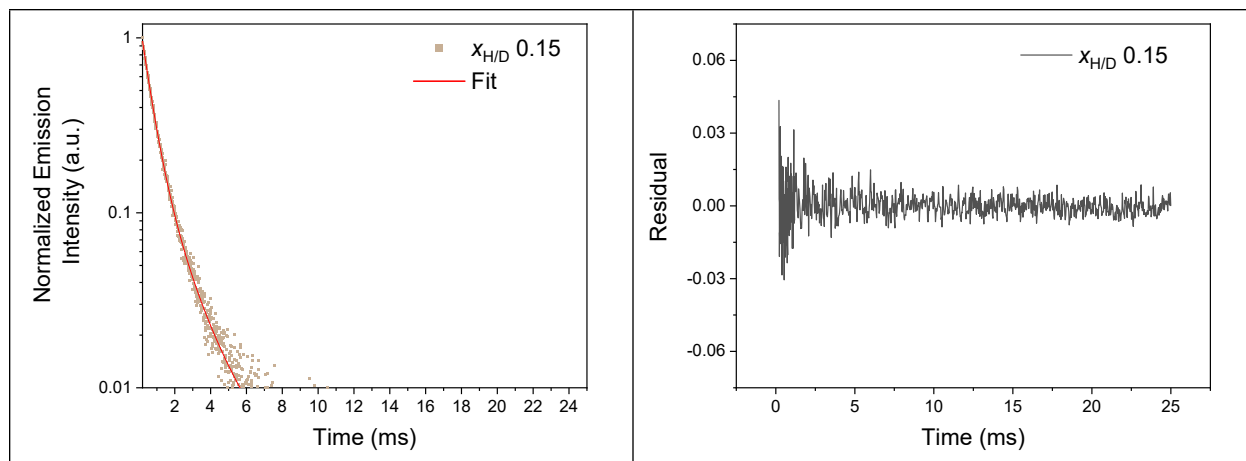

**Figure S14.** (left) Individual emission decay traces of  $[\text{Eu}(\text{H}_2\text{O})_9]^{3+}$  in  $\text{H}_2\text{O}/\text{D}_2\text{O}$  mixtures in frozen solution at 77 K. Data has been fitted to a tri-exponential decay with a global model (right) Residual of fit and data.

**Table S4.** Fit parameters for global fit of  $[\text{Eu}(\text{H}_2\text{O})_9]^{3+}$  at 77 K. \*denotes fixed parameters

|                  | $\tau_1$            | $\tau_2$           | $\tau_3$           |
|------------------|---------------------|--------------------|--------------------|
| Global Parameter | $4.247 \pm 0.0090$  | $1.331 \pm 0.014$  | $0.529 \pm 0.0048$ |
| $x_{\text{H/D}}$ | $A_1$               | $A_2$              | $A_3$              |
| 0                | $0.923 \pm 0.0029$  | $0.115 \pm 0.0037$ | $0 \pm 0^*$        |
| 0.025            | $0.367 \pm 0.0024$  | $0.593 \pm 0.007$  | $0.174 \pm 0.0099$ |
| 0.05             | $0.229 \pm 0.0021$  | $0.627 \pm 0.0083$ | $0.358 \pm 0.011$  |
| 0.075            | $0.144 \pm 0.0018$  | $0.577 \pm 0.0091$ | $0.548 \pm 0.011$  |
| 0.1              | $0.0936 \pm 0.0015$ | $0.470 \pm 0.0096$ | $0.750 \pm 0.0099$ |
| 0.125            | $0.0594 \pm 0.0013$ | $0.337 \pm 0.0098$ | $0.926 \pm 0.0088$ |
| 0.15             | $0.0232 \pm 0.0013$ | $0.264 \pm 0.010$  | $1.04 \pm 0.0083$  |

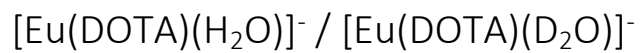

293 K

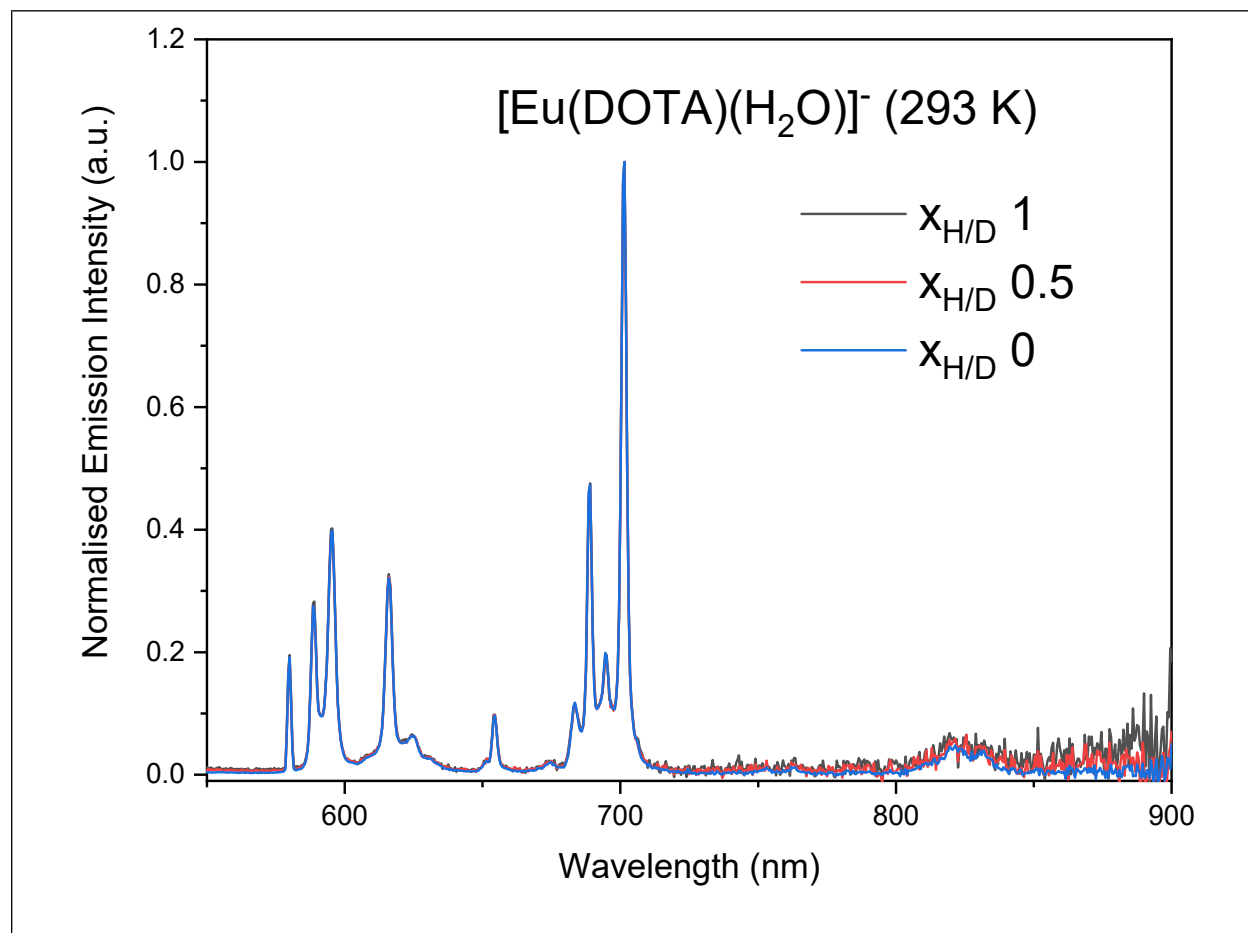

**Figure S15.** Normalised emission spectra of  $[\text{Eu}(\text{DOTA})(\text{H}_2\text{O})]^-$  in mixtures of  $\text{H}_2\text{O}/\text{D}_2\text{O}$  in solution at 293 K. Emission slits were kept at 2 nm.

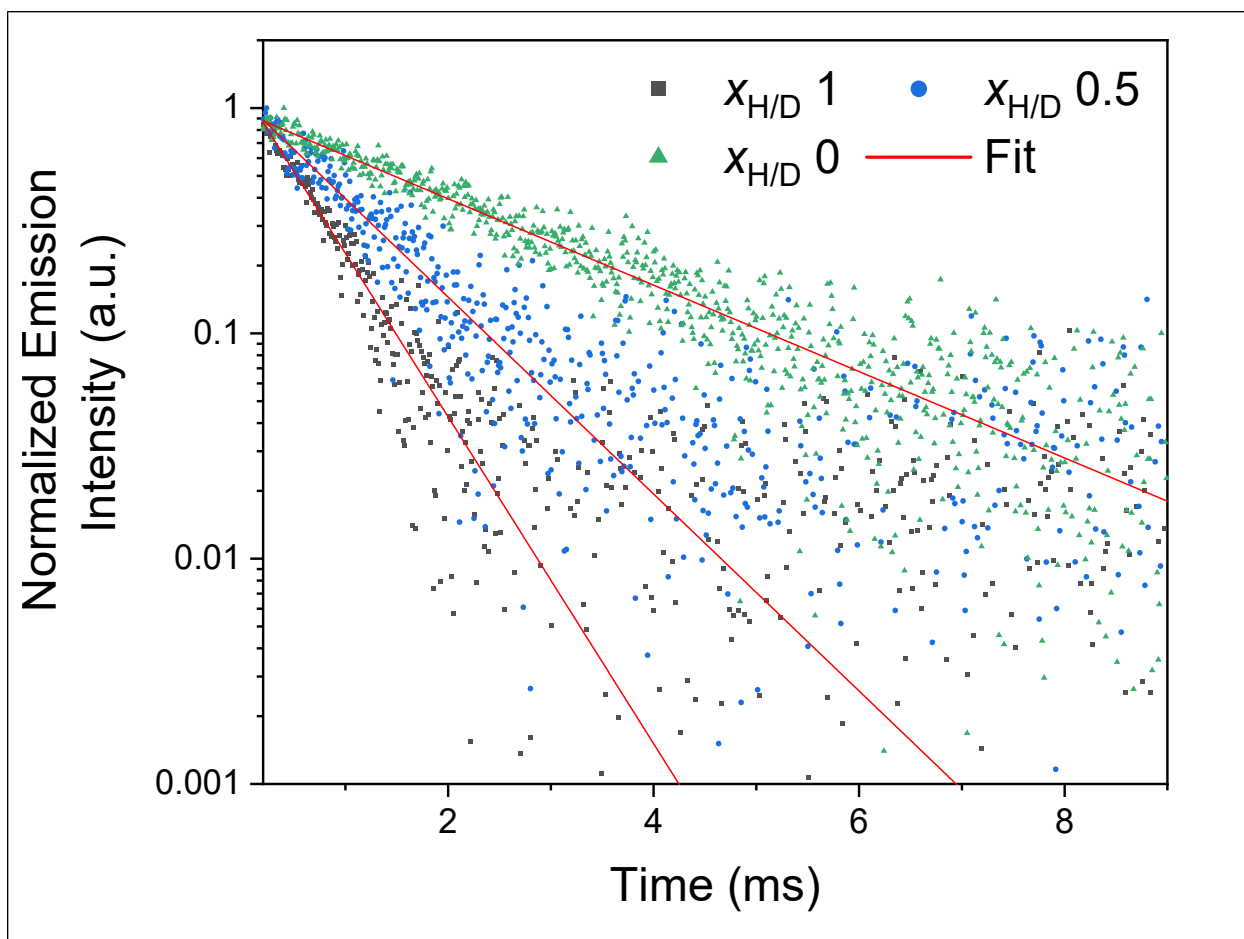

**Figure S16.** Emission decay traces of  $[\text{Eu}(\text{DOTA})(\text{H}_2\text{O})]^-$  in mixtures of  $\text{H}_2\text{O}/\text{D}_2\text{O}$  in solution at 293 K. Data has been fitted with a mono-exponential decay function.

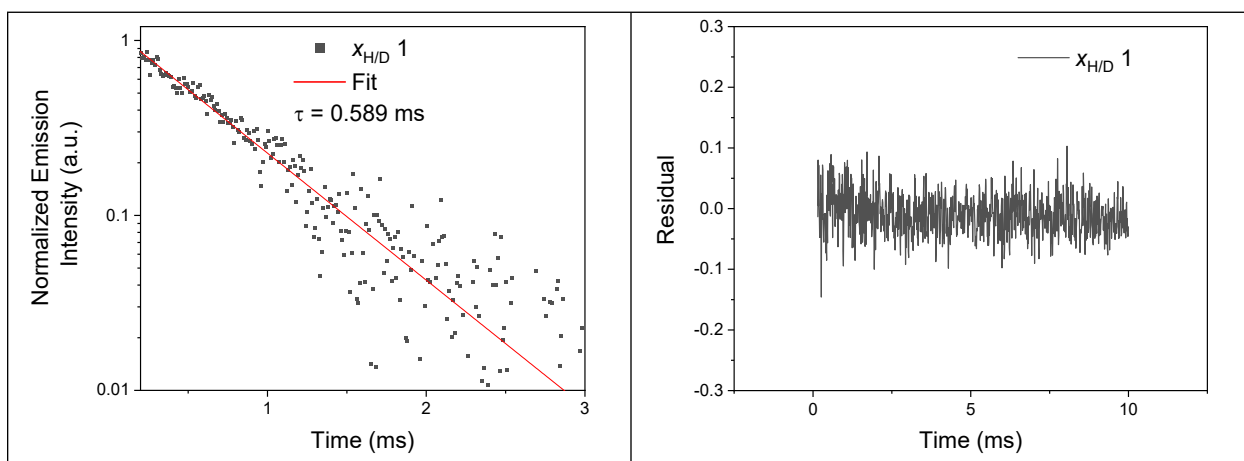

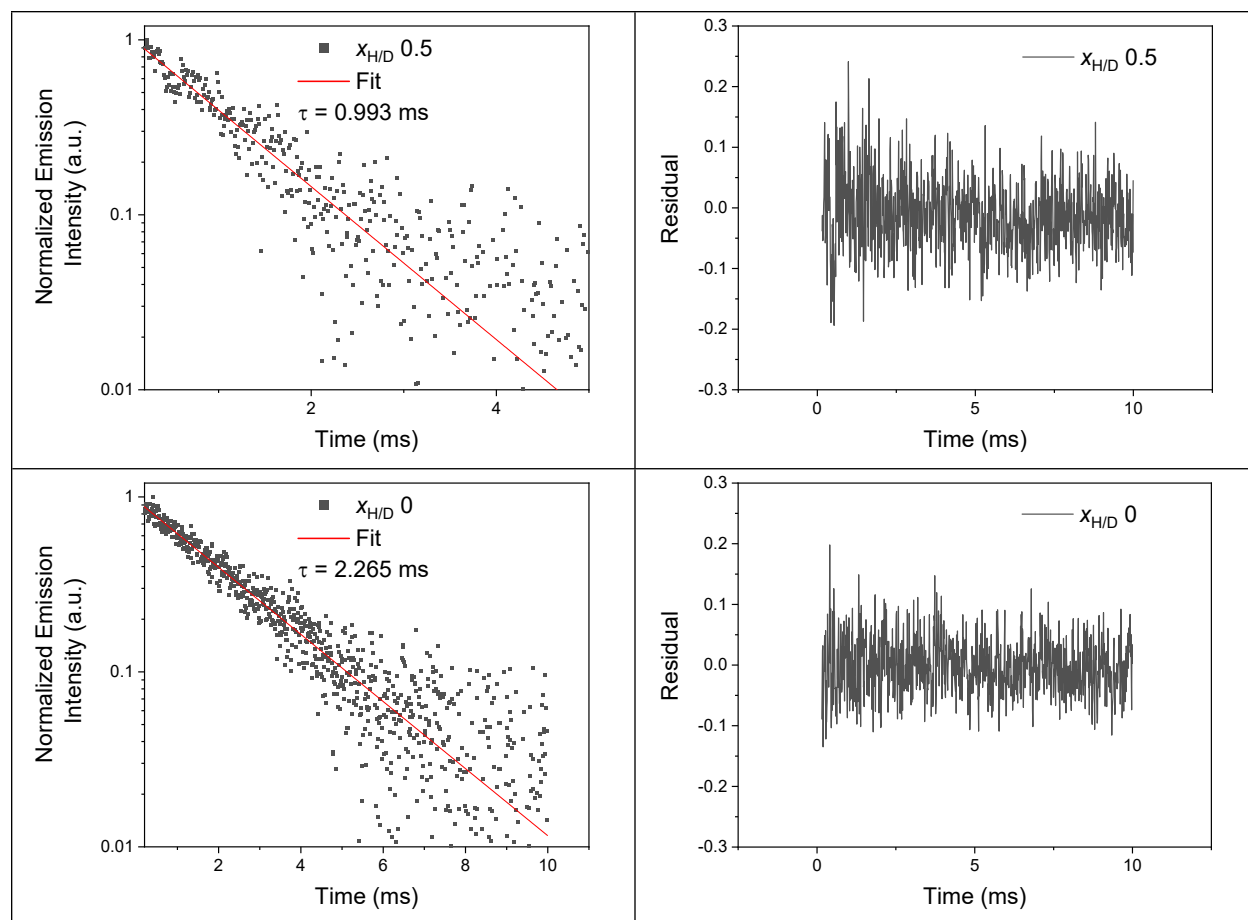

**Figure S17.** (left) Individual emission decay traces of  $[\text{Eu}(\text{DOTA})(\text{H}_2\text{O})]^-$  in mixtures of  $\text{H}_2\text{O}/\text{D}_2\text{O}$  in solution at 293 K. Data has been fitted with a mono-exponential decay function. (right) Residual of fit and data.

**Table S5.** Fit parameters for of  $[\text{Eu}(\text{DOTA})(\text{H}_2\text{O})]^-$  at 293 K

| $x_{\text{H}/\text{D}}$ | A                  | $\tau$             |
|-------------------------|--------------------|--------------------|
| 1                       | $1.21 \pm 0.015$   | $0.599 \pm 0.0081$ |
| 0.5                     | $1.09 \pm 0.016$   | $0.993 \pm 0.018$  |
| 0                       | $0.958 \pm 0.0070$ | $2.265 \pm 0.022$  |

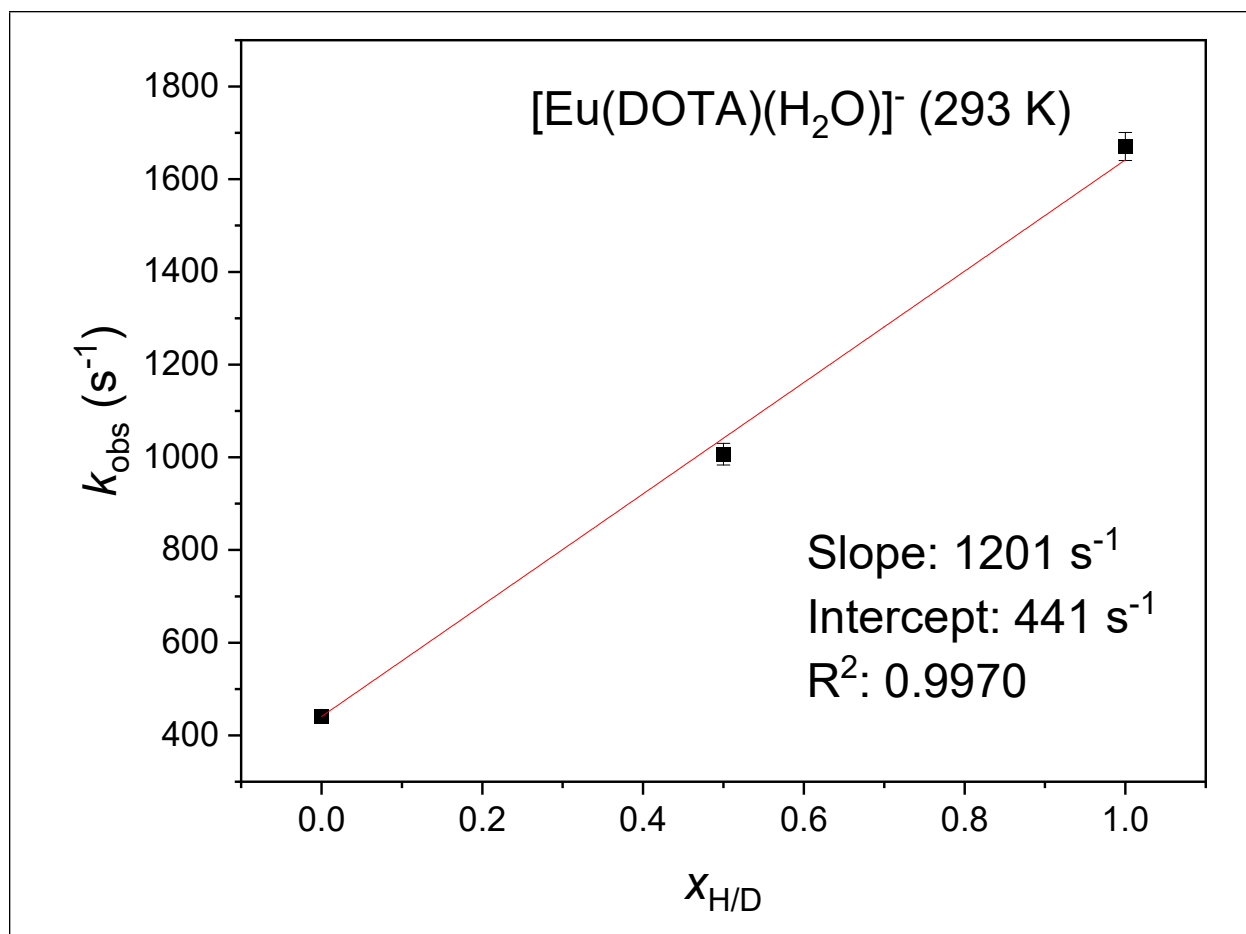

**Figure S18.** Observed rate of deactivation ( $k_{\text{obs}}$ ) of the  $^5\text{D}_0$  state of  $[\text{Eu}(\text{DOTA})(\text{H}_2\text{O})]^-$  in mixtures of  $\text{H}_2\text{O}/\text{D}_2\text{O}$  in solution at 293 K. Data has been fitted with a linear function.



77 K

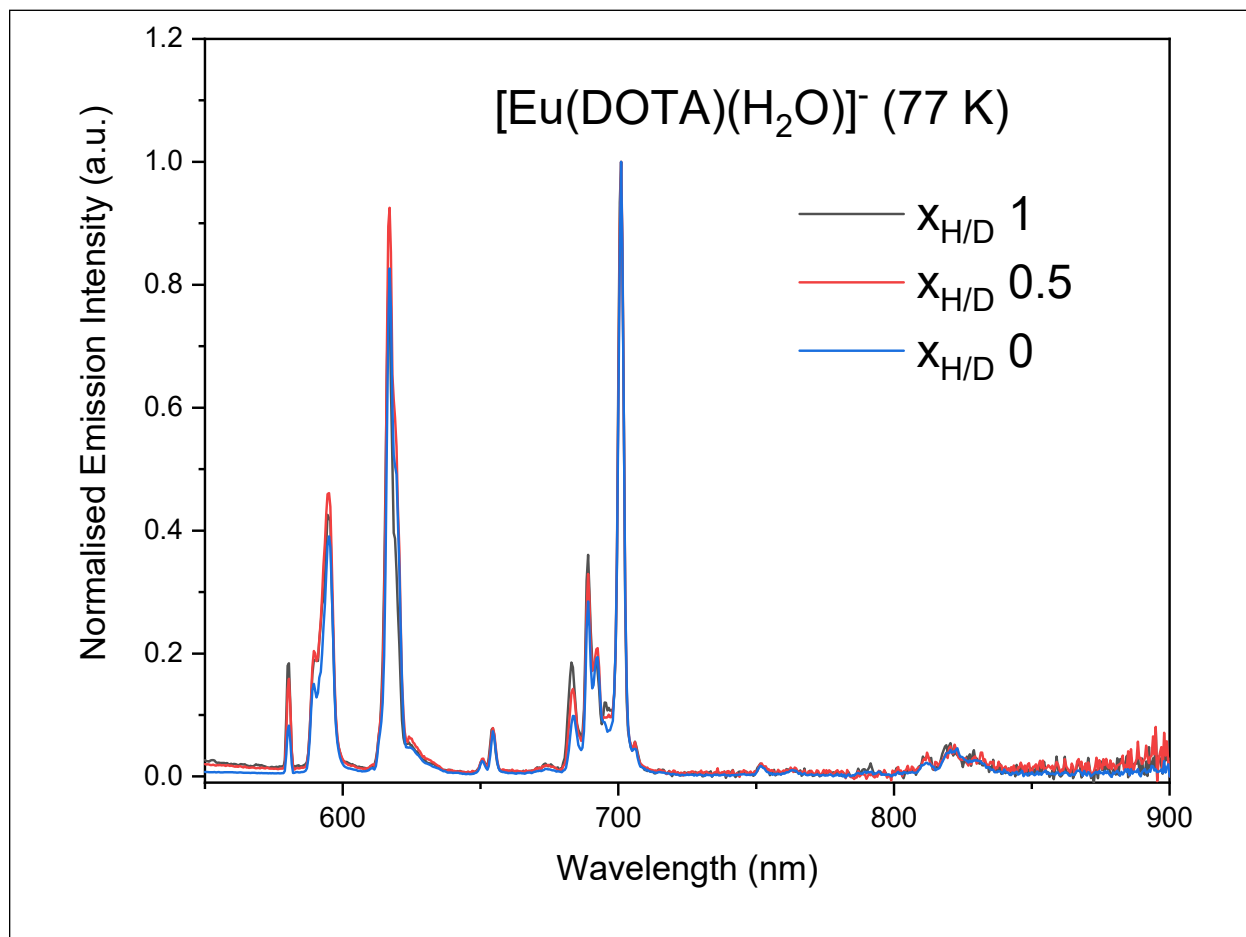

**Figure S19.** Normalised emission spectra of [Eu(DOTA)(H<sub>2</sub>O)]<sup>-</sup> in mixtures of H<sub>2</sub>O/D<sub>2</sub>O in frozen solution at 77 K. Emission slits were kept at 2 nm.

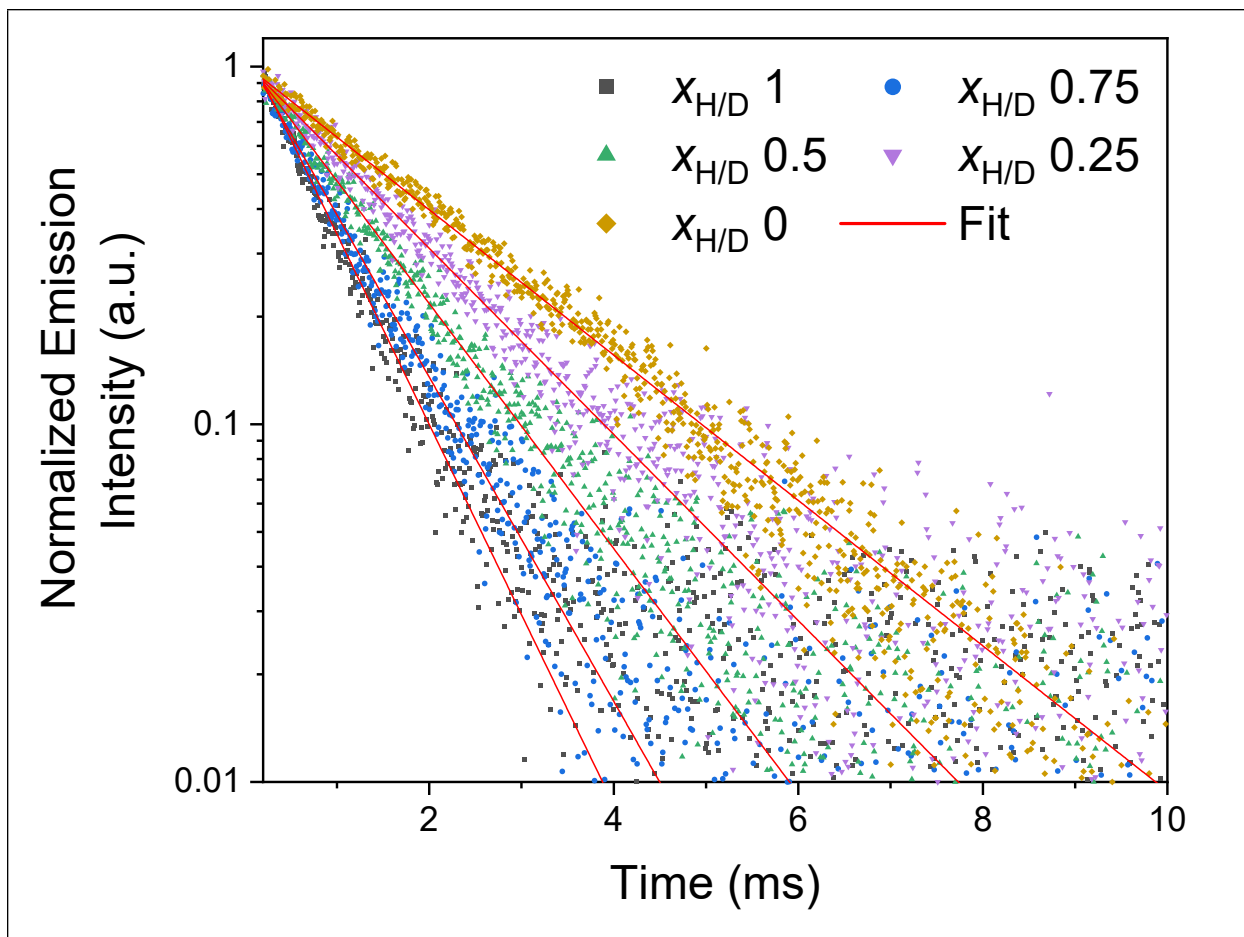

**Figure S20.** Emission decay traces of  $[\text{Eu}(\text{DOTA})(\text{H}_2\text{O})]^-$  in mixtures of  $\text{H}_2\text{O}/\text{D}_2\text{O}$  in frozen solution at 77 K. Data has been fitted with a mono-exponential decay function.

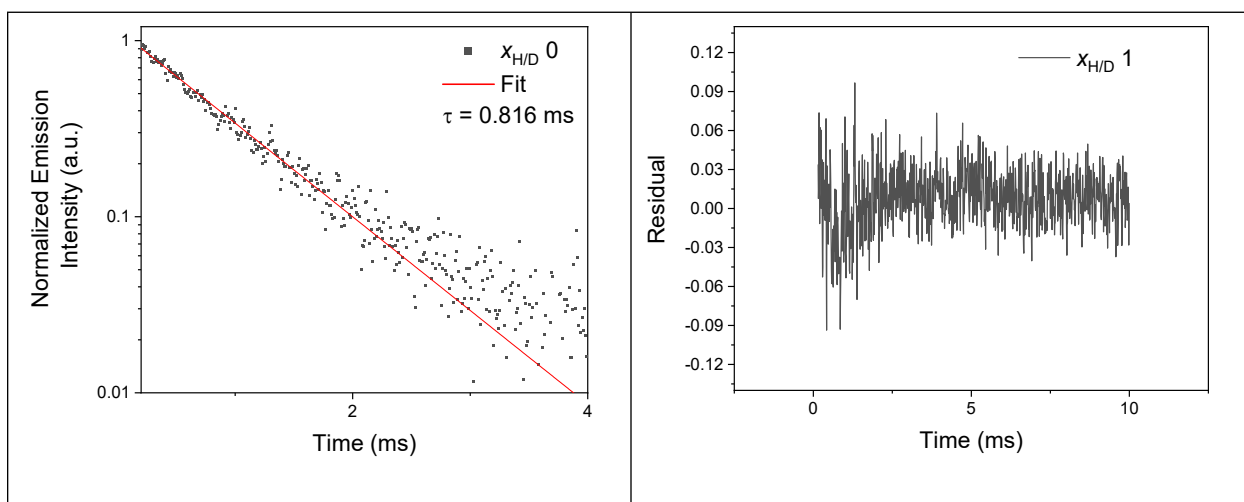

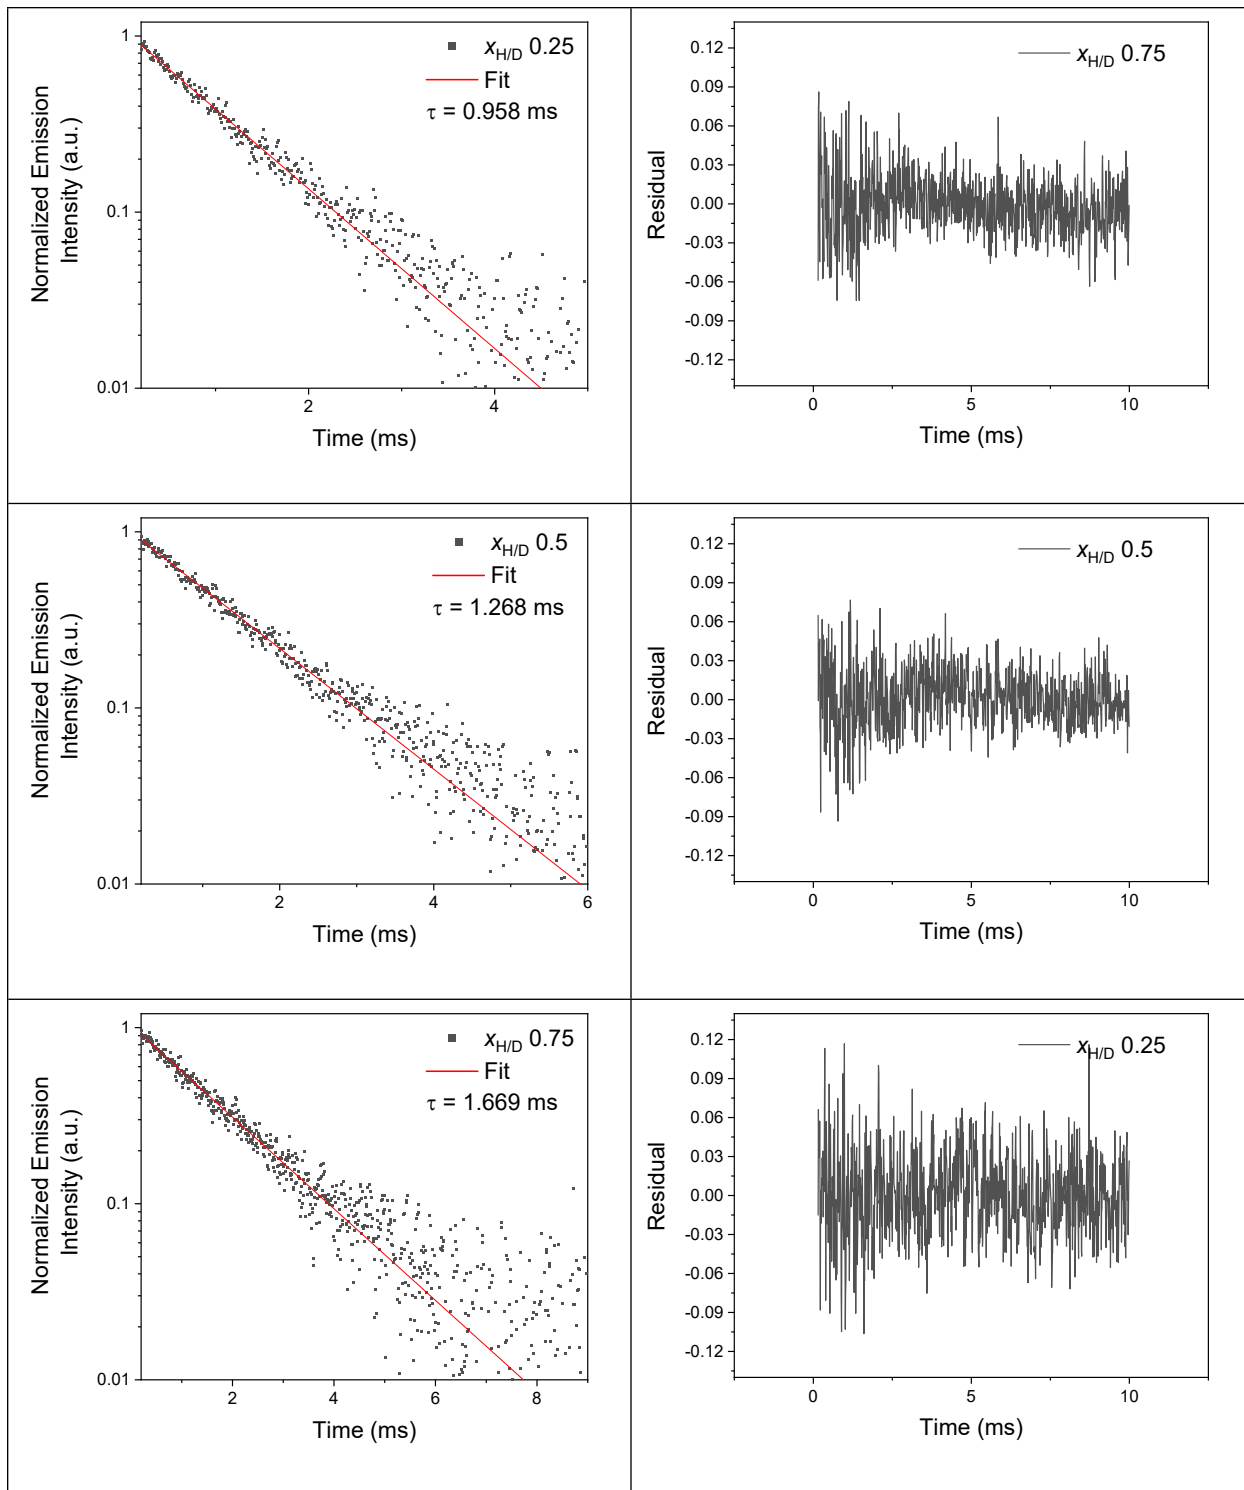

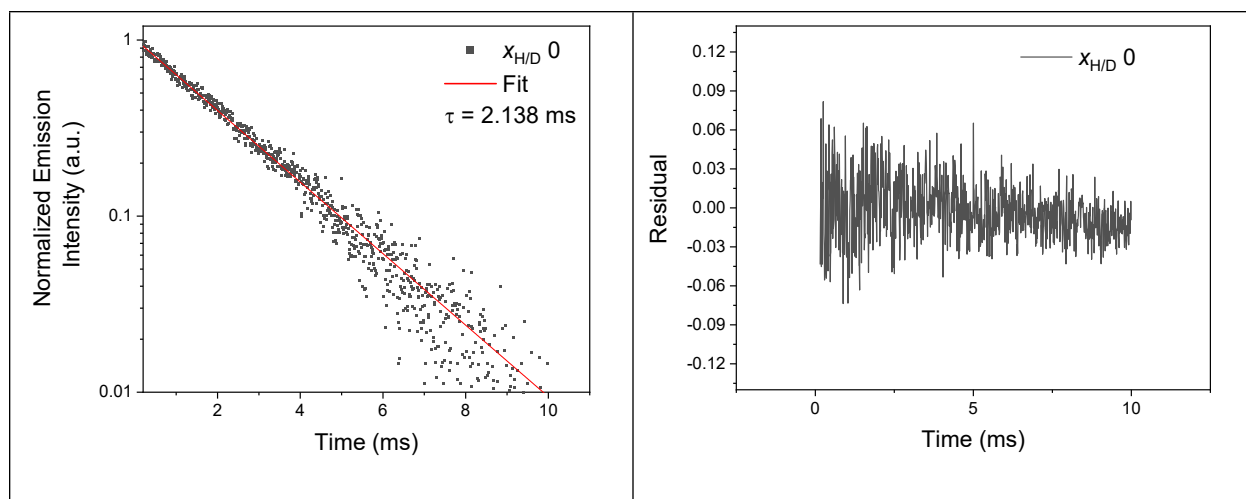

**Figure S21.** (left) Individual emission decay traces of  $[\text{Eu}(\text{DOTA})(\text{H}_2\text{O})]^-$  in mixtures of  $\text{H}_2\text{O}/\text{D}_2\text{O}$  in frozen solution at 77 K. Data has been fitted with a mono-exponential decay function. (right) Residual of fit and data.

**Table S6.** Fit parameters for of  $[\text{Eu}(\text{DOTA})(\text{H}_2\text{O})]^-$  at 77 K

| $x_{\text{H/D}}$ | $A$               | $\tau$             |
|------------------|-------------------|--------------------|
| 1                | $1.16 \pm 0.0075$ | $0.816 \pm 0.0062$ |
| 0.75             | $1.09 \pm 0.0062$ | $0.958 \pm 0.0066$ |
| 0.5              | $1.05 \pm 0.0049$ | $1.268 \pm 0.0074$ |
| 0.25             | $1.03 \pm 0.0057$ | $1.669 \pm 0.012$  |
| 0                | $1.01 \pm 0.0035$ | $2.138 \pm 0.0097$ |

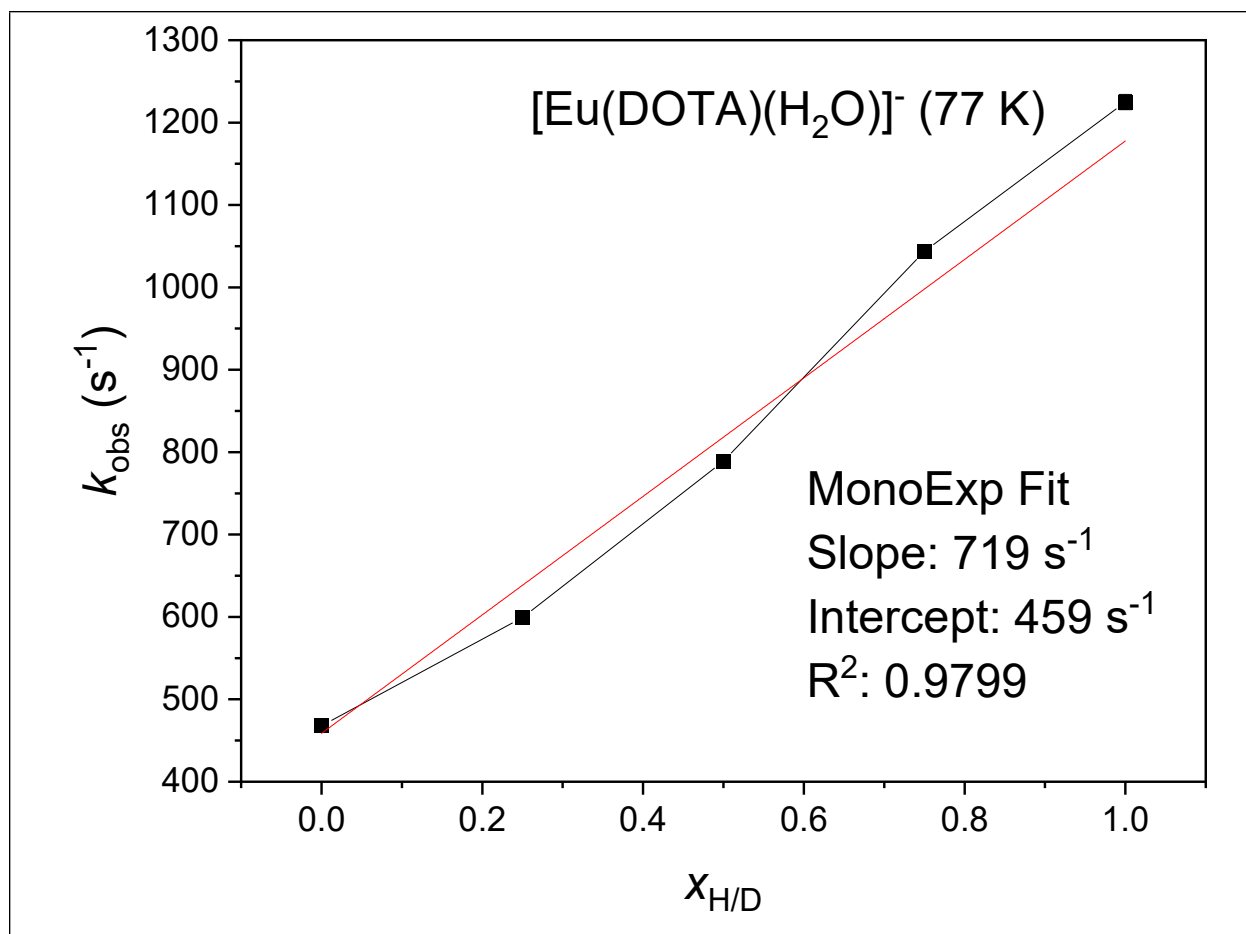

**Figure S22.** Observed rate of deactivation ( $k_{obs}$ ) of the  $^5D_0$  state of [Eu(DOTA)(H<sub>2</sub>O)]<sup>-</sup> in mixtures of H<sub>2</sub>O/D<sub>2</sub>O in frozen solution at 77 K. Obtained from mono-exponential fit. Data has been fitted with a linear function.

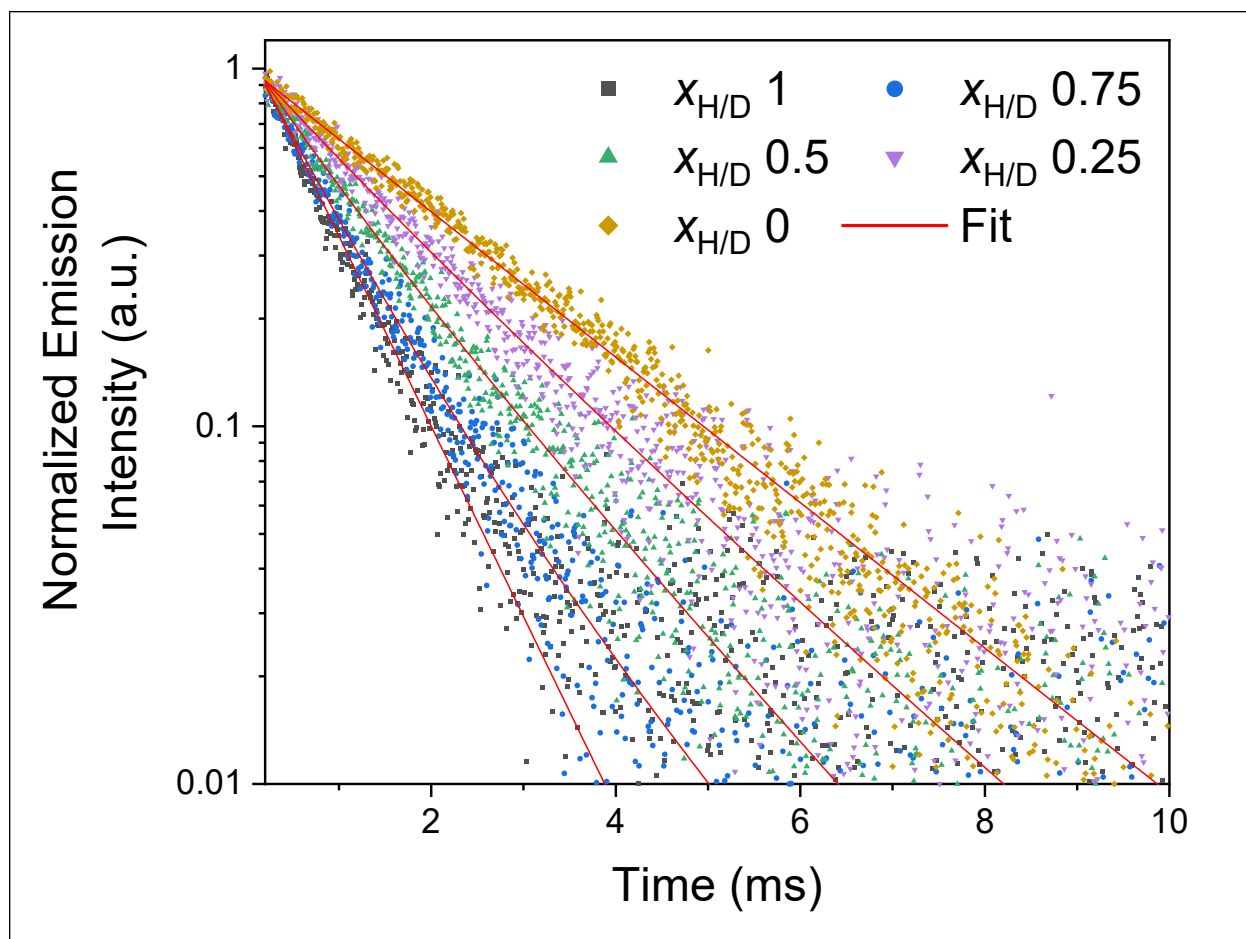

**Figure S23.** Emission decay traces of  $[\text{Eu}(\text{DOTA})(\text{H}_2\text{O})]^-$  in mixtures of  $\text{H}_2\text{O}/\text{D}_2\text{O}$  in frozen solution at 77 K. Data has been fitted globally with a tri-exponential decay function.

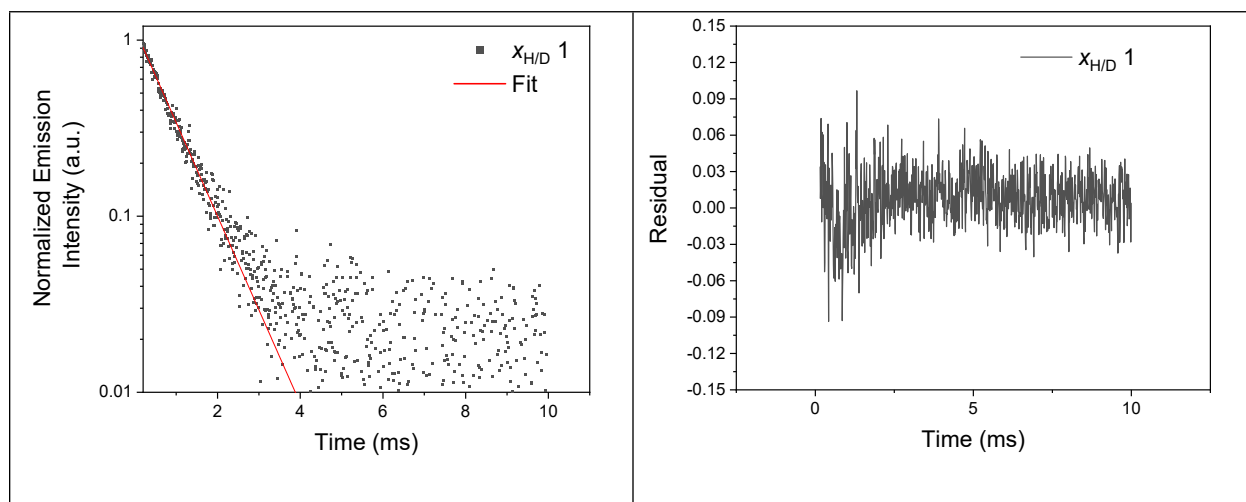

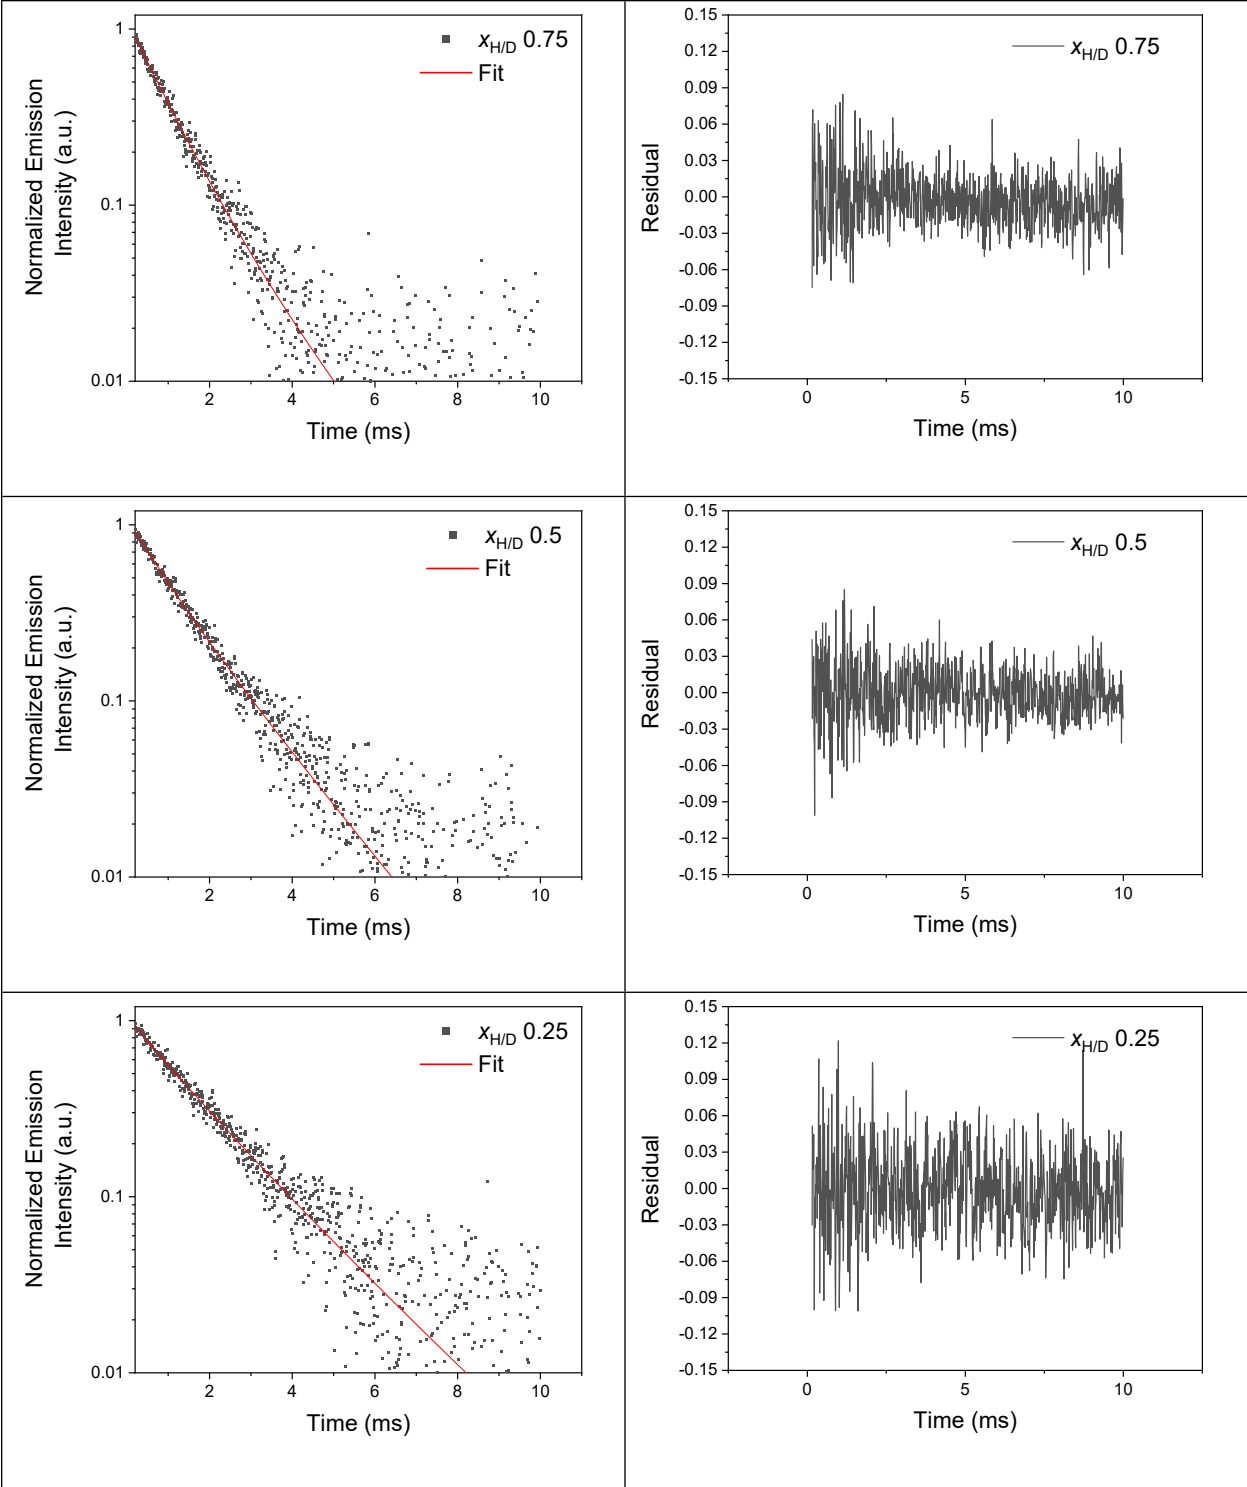

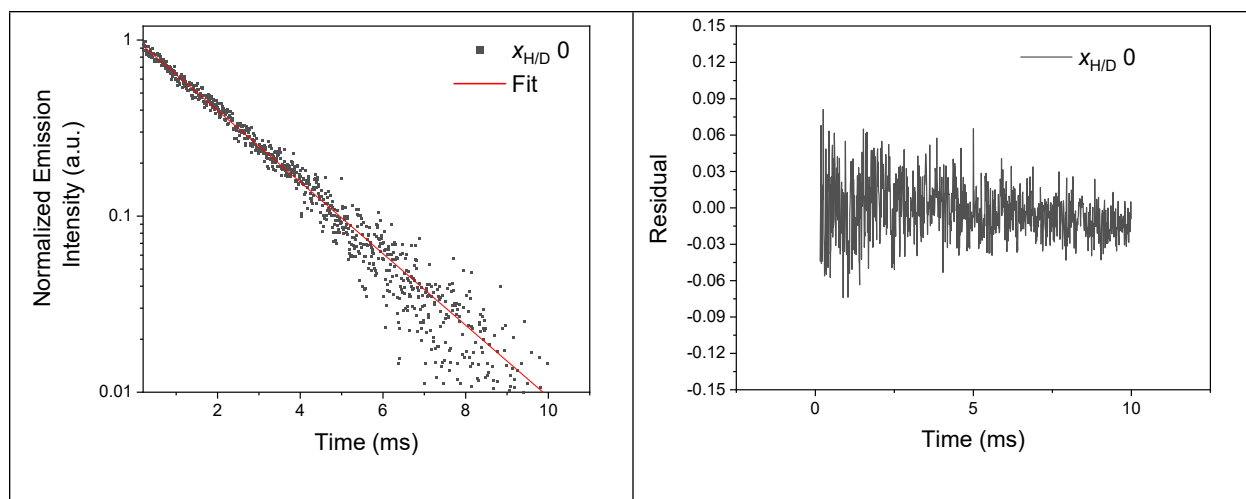

**Figure S24.** (left) Individual emission decay traces of  $[\text{Eu}(\text{DOTA})(\text{H}_2\text{O})]^-$  in mixtures of  $\text{H}_2\text{O}/\text{D}_2\text{O}$  in frozen solution at 77 K. Data has been fitted globally with a tri-exponential decay function. (right) Residual of fit and data.

**Table S7.** Fit parameters for global fit of  $[\text{Eu}(\text{DOTA})(\text{H}_2\text{O})]^-$  at 77 K. \* denotes fixed parameters.

|                  | $\tau_1$           | $\tau_2$          | $\tau_3$          |
|------------------|--------------------|-------------------|-------------------|
| Global Parameter | $0.817 \pm 0.006$  | $1.518 \pm 0.206$ | $2.136 \pm 0.065$ |
| $x_{\text{H/D}}$ | $A_1$              | $A_2$             | $A_3$             |
| 1                | $1.16 \pm 0.0076$  | $0 \pm 0^*$       | $0 \pm 0^*$       |
| 0.75             | $0.906 \pm 0.045$  | $0.218 \pm 0.067$ | $0 \pm 0.058$     |
| 0.5              | $0.443 \pm 0.087$  | $0.669 \pm 0.093$ | $0 \pm 0.15$      |
| 0.25             | $0.0946 \pm 0.082$ | $0.624 \pm 0.11$  | $0.334 \pm 0.15$  |
| 0                | $0 \pm 0^*$        | $0 \pm 0.11$      | $1.01 \pm 0.11$   |



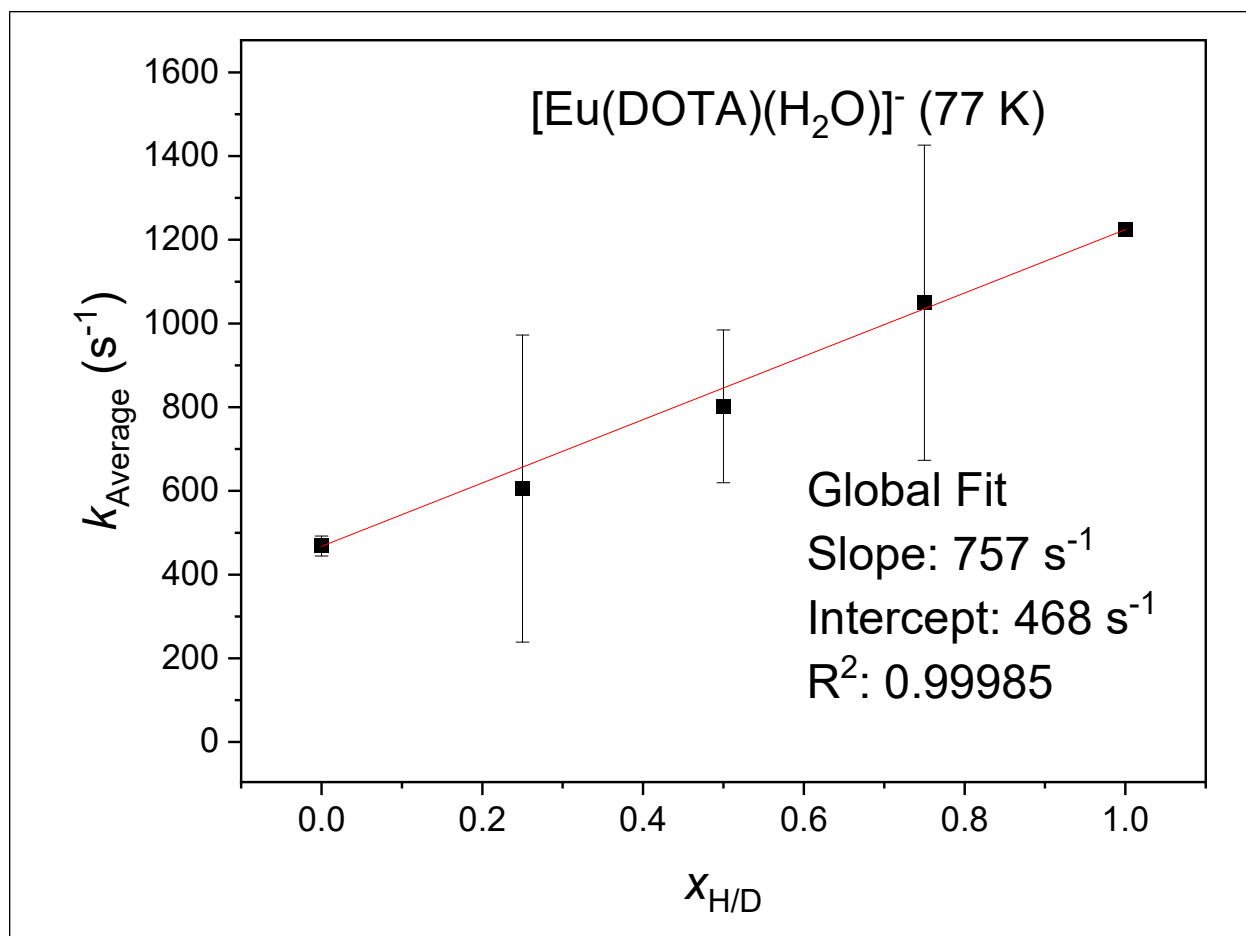

**Figure S25.** Average rate of deactivation ( $k_{Average}$ ) of the  $^5D_0$  state of [Eu(DOTA)(H<sub>2</sub>O)]<sup>-</sup> in mixtures of H<sub>2</sub>O/D<sub>2</sub>O in frozen solution at 77 K obtained from amplitude averaged excited state lifetimes of global fit. Data has been fitted with a linear function.

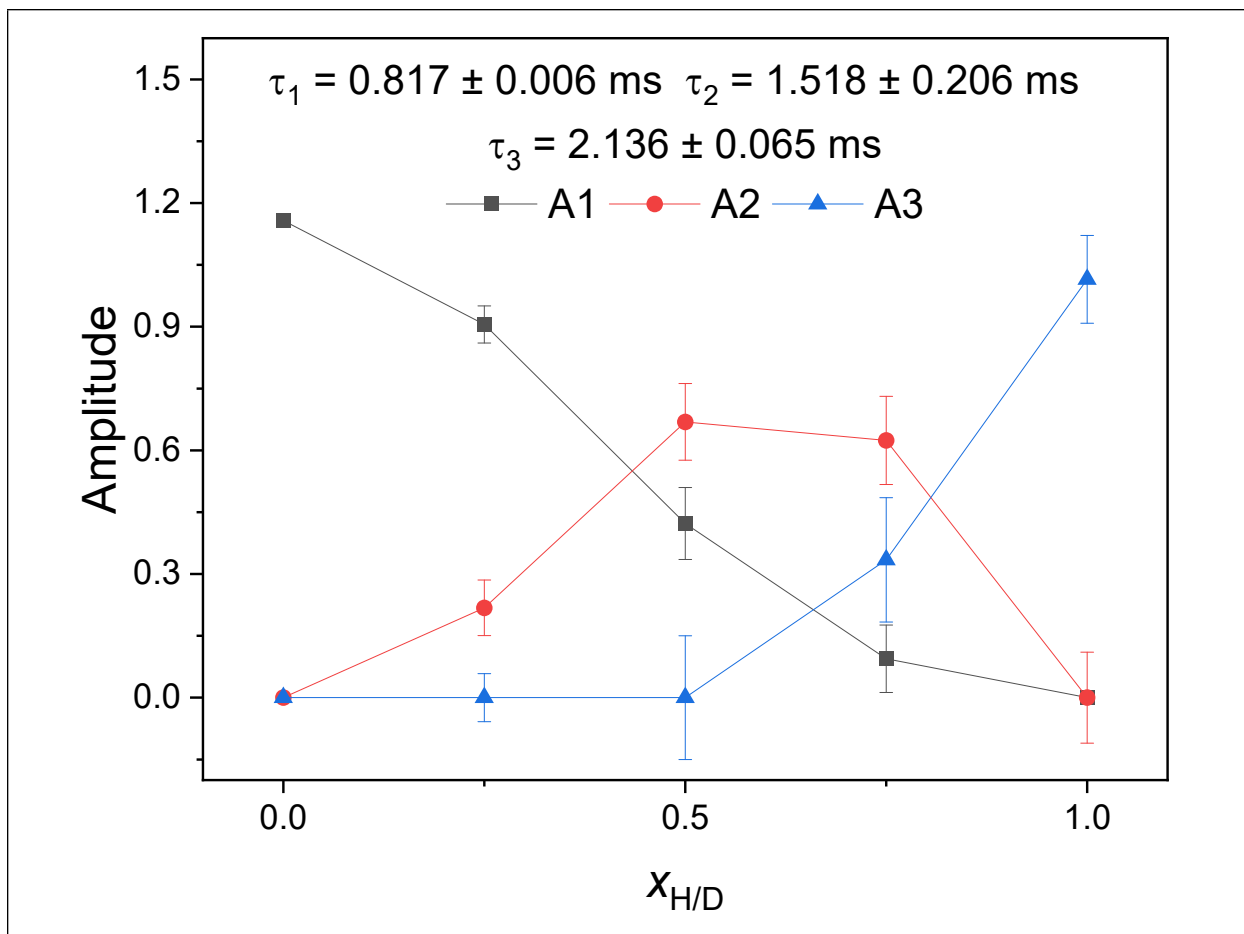

Figure S26. Amplitudes from global fit of  $[\text{Eu}(\text{DOTA})(\text{H}_2\text{O})]^-$  in mixtures of  $\text{H}_2\text{O}/\text{D}_2\text{O}$  in frozen solution at 77 K.

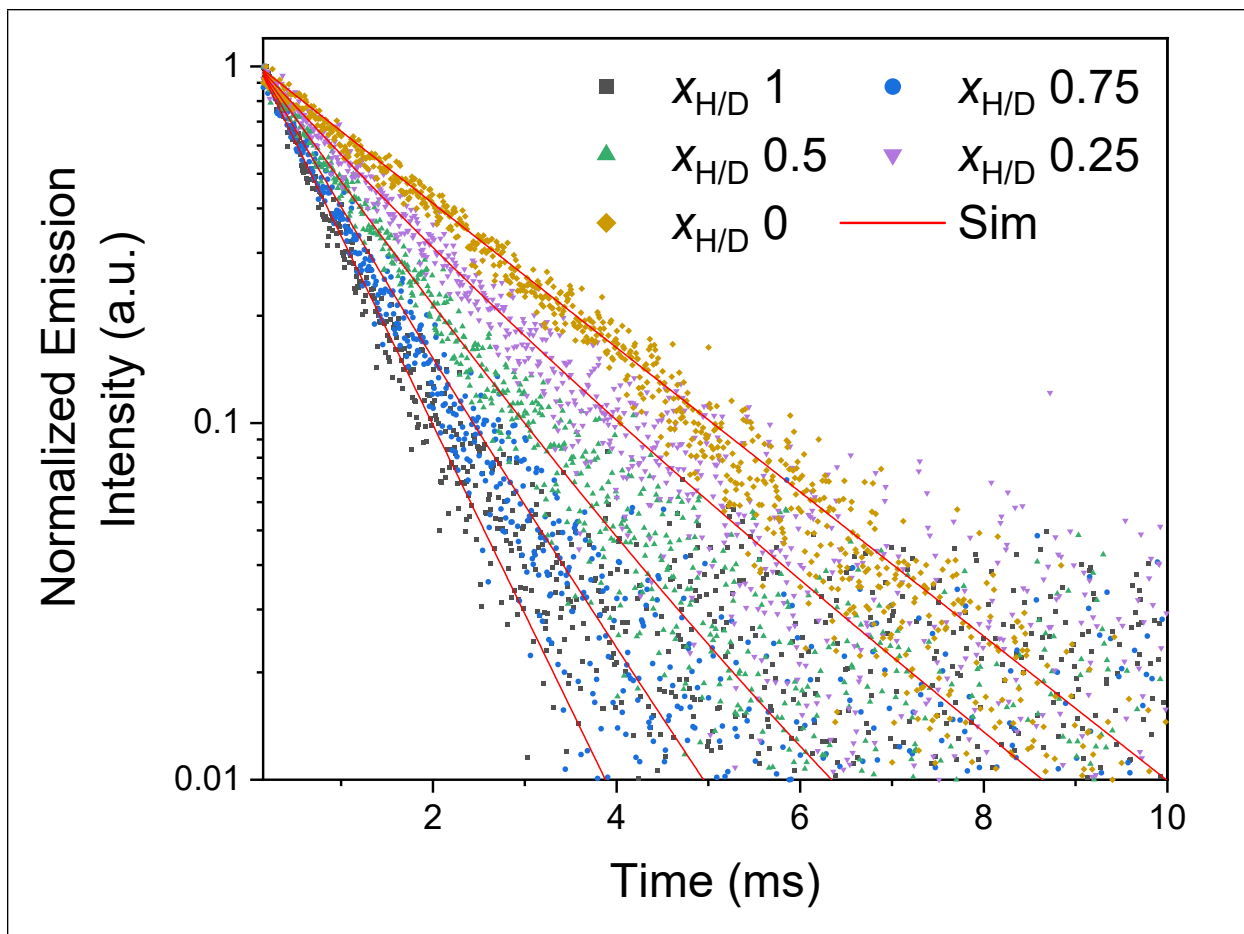

**Figure S27.** Emission decay traces of  $[\text{Eu}(\text{DOTA})(\text{H}_2\text{O})]^-$  in mixtures of  $\text{H}_2\text{O}/\text{D}_2\text{O}$  in frozen solution at 77 K with simulated data using a 3-component model.

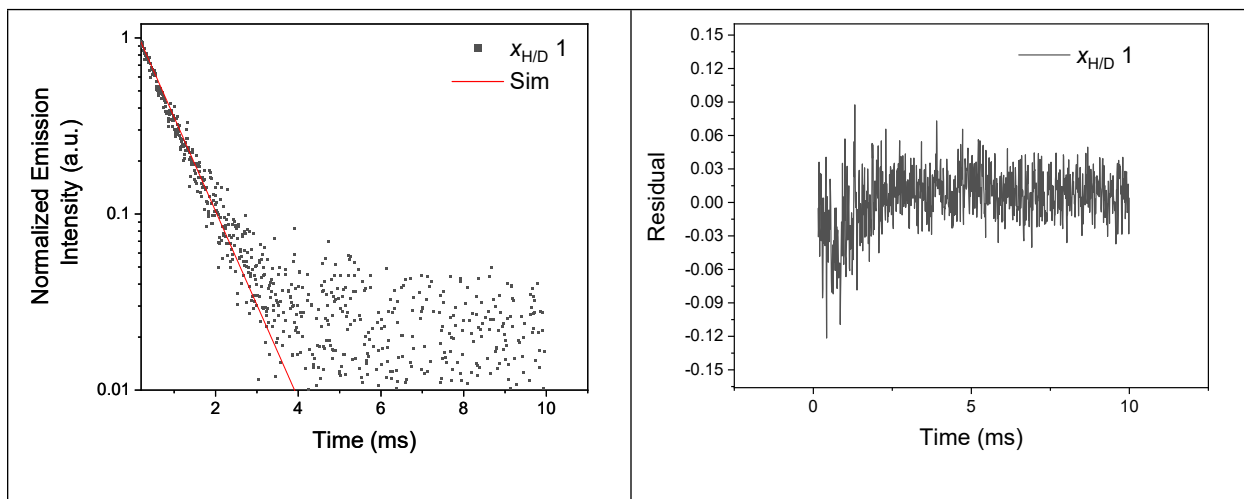

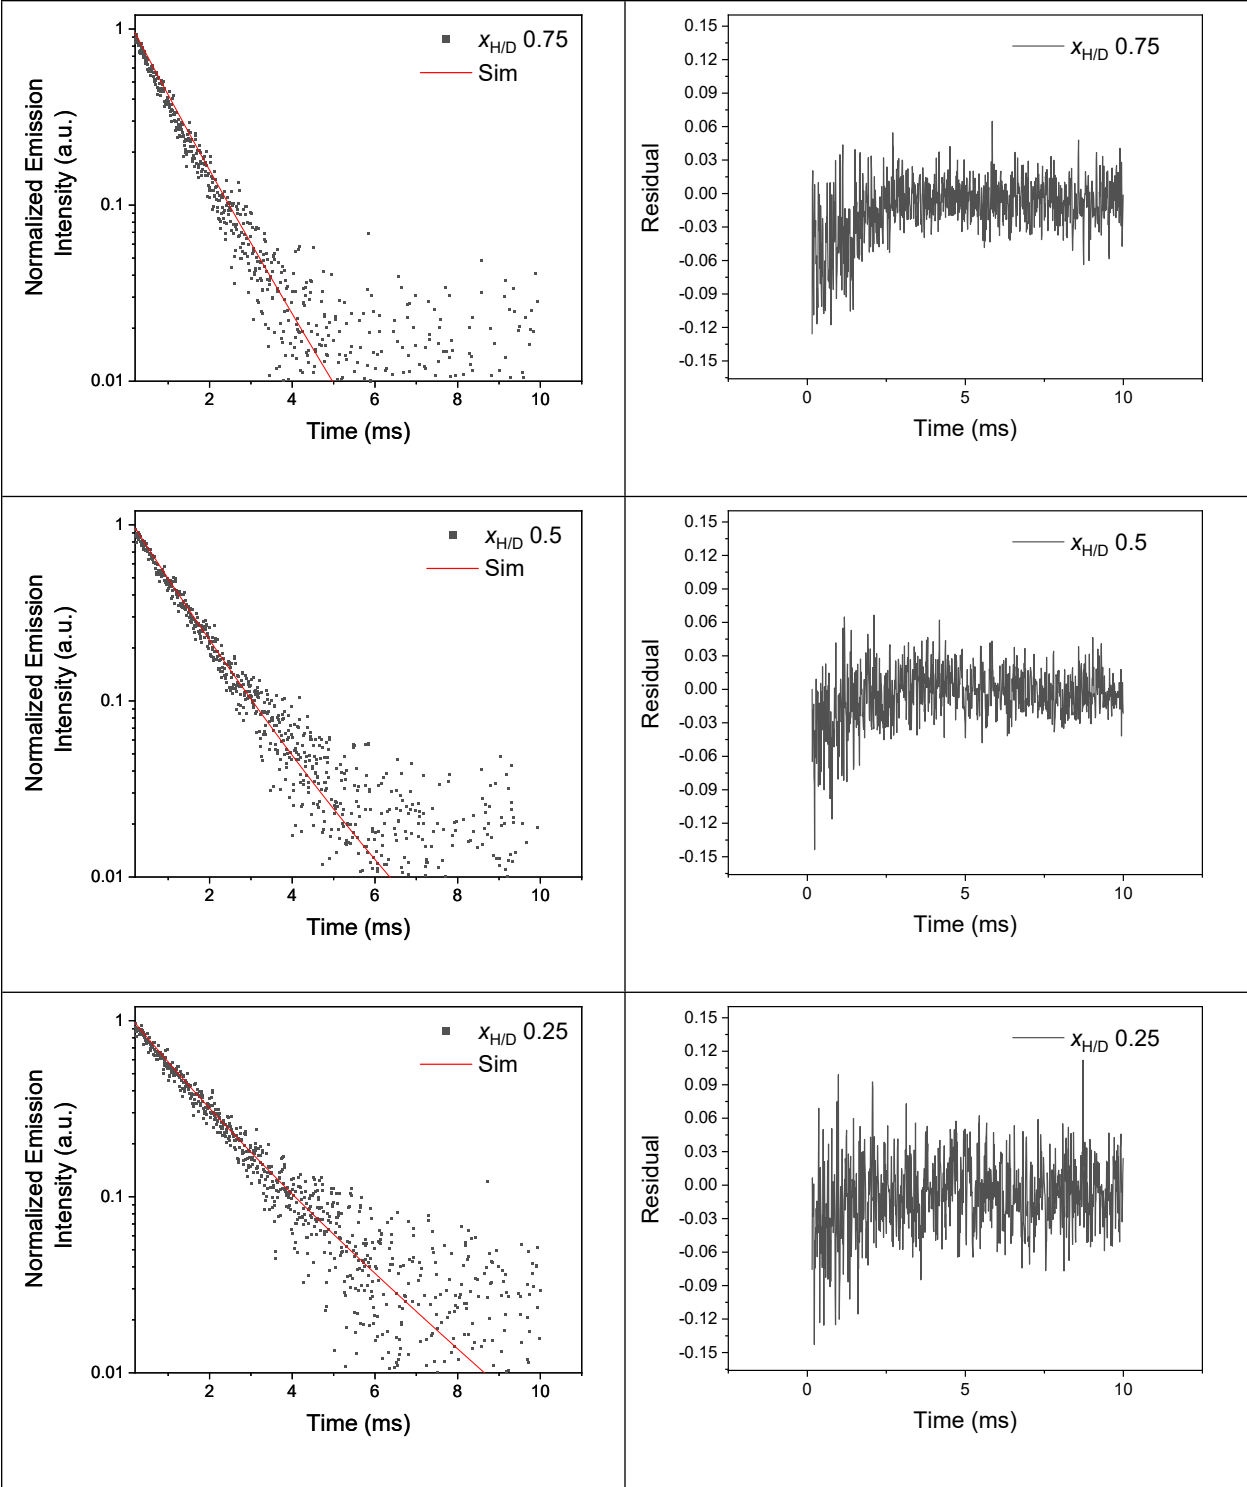

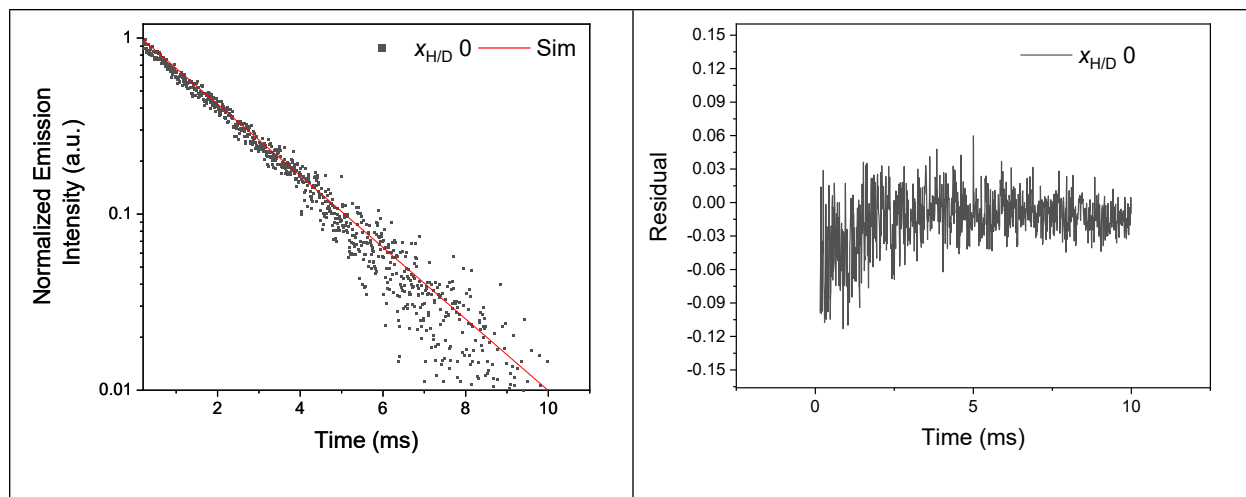

**Figure S28.** (left) Individual emission decay traces of  $[\text{Eu}(\text{DOTA})(\text{H}_2\text{O})]^-$  in mixtures of  $\text{H}_2\text{O}/\text{D}_2\text{O}$  in frozen solution at 77 K with simulated data using a 3-component model. (right) Residual between simulation and data.

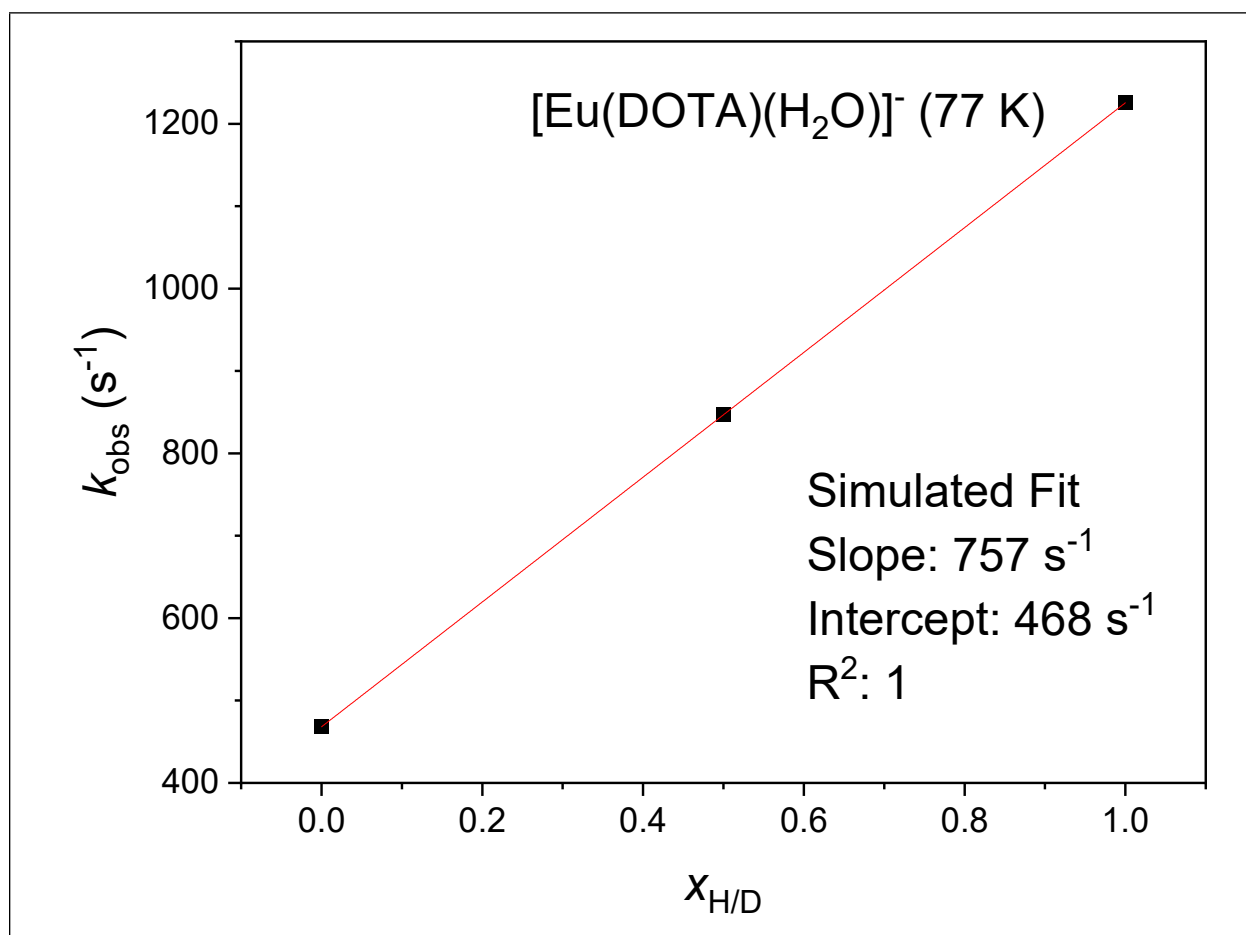

**Figure S29.** Observed rate of deactivation ( $k_{\text{obs}}$ ) of the  $^5\text{D}_0$  state of  $[\text{Eu}(\text{DOTA})(\text{H}_2\text{O})]^-$  obtained from excited state lifetimes used in the simulated fits.

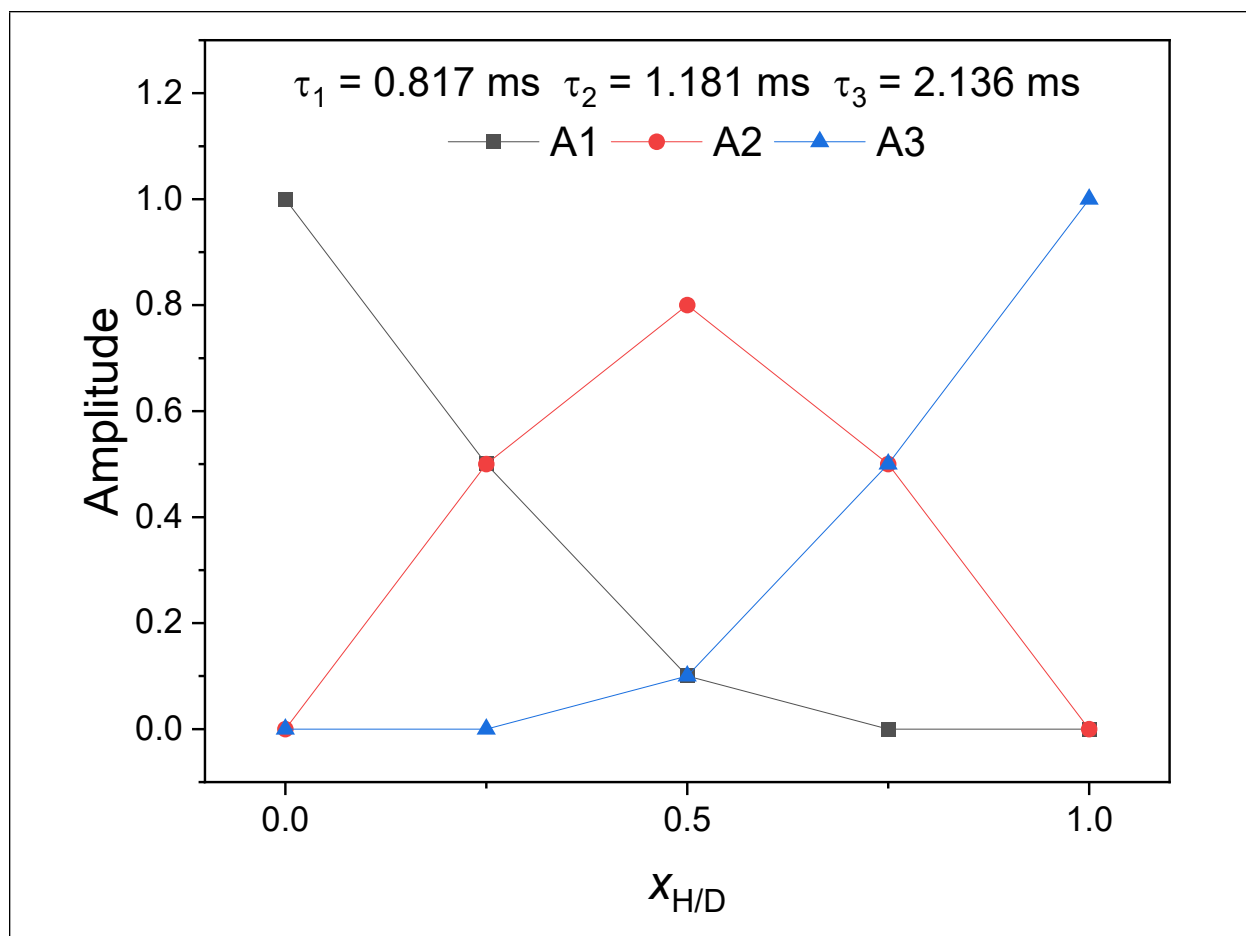

Figure S30. Amplitudes used in simulated excited state lifetimes of  $[\text{Eu}(\text{DOTA})(\text{H}_2\text{O})]^-$ .

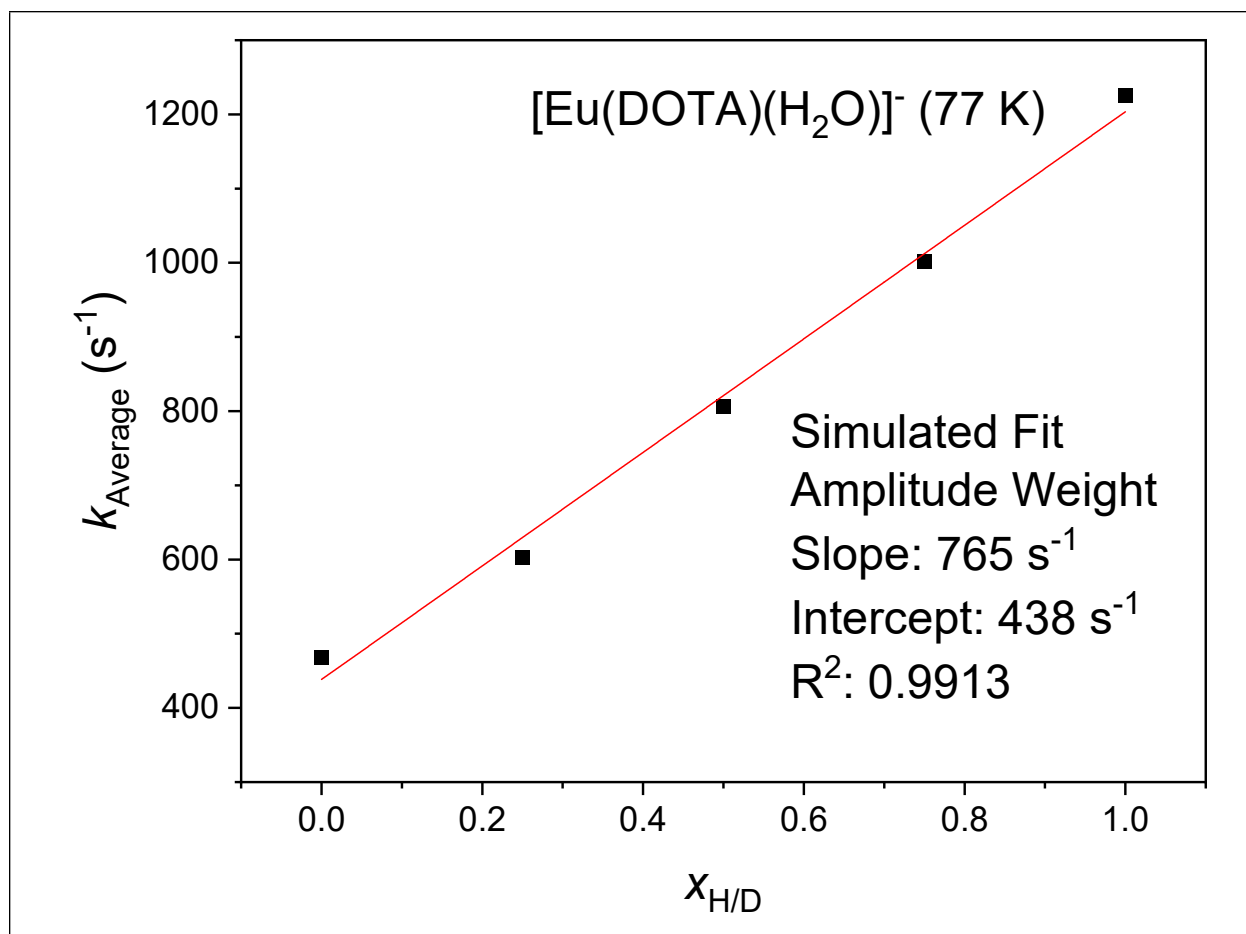

**Figure S31.** Average rate of deactivation ( $k_{Average}$ ) of the  $^5D_0$  state of [Eu(DOTA)(H<sub>2</sub>O)]<sup>-</sup>. Obtained from amplitude-weighted averages of simulated lifetimes. Data has been fitted with a linear function

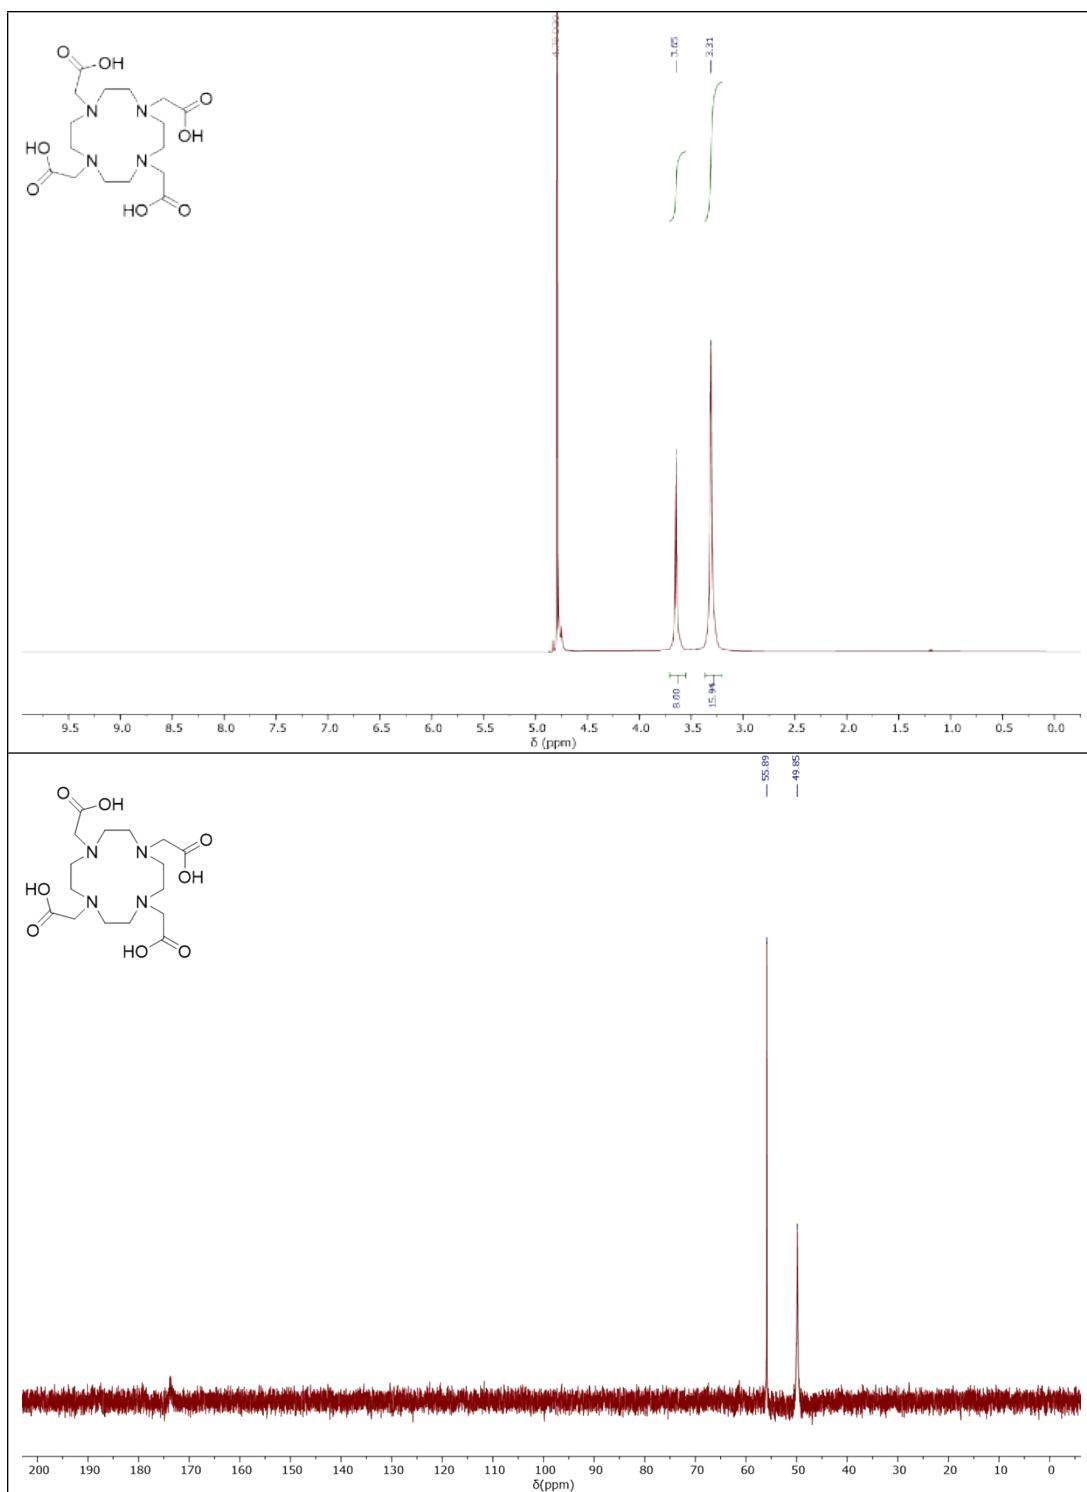

**Figure S32.** <sup>1</sup>H-NMR (top) and <sup>13</sup>C-NMR (bottom) spectra of H<sub>4</sub>DOTA in D<sub>2</sub>O.

**<sup>1</sup>H-NMR** (500 MHz, D<sub>2</sub>O) δ 3.65 (s, 8H), 3.31 (s, 16H).

**<sup>13</sup>C-NMR** (126 MHz, D<sub>2</sub>O) δ 55.89, 49.85.

**HRMS** (ESI<sup>+</sup>): m/z calculated for C<sub>16</sub>H<sub>28</sub>N<sub>4</sub>O<sub>8</sub> [M+H]<sup>+</sup>: 405.1907; found 405.1990.



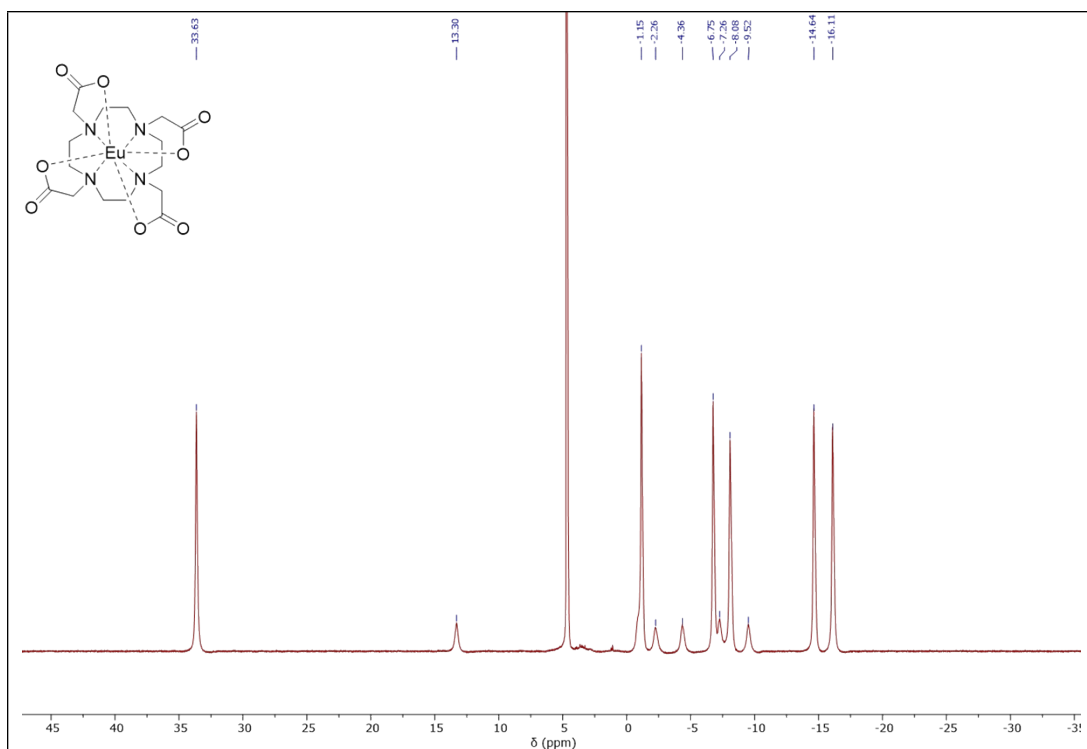

**Figure S33.** Paramagnetic  $^1\text{H-NMR}$  spectra of  $[\text{Eu}(\text{DOTA})(\text{D}_2\text{O})]^-$  in  $\text{D}_2\text{O}$ .

$^1\text{H NMR}$  (500 MHz,  $\text{D}_2\text{O}$ )  $\delta$  33.63, -1.15, -6.75, -8.09, -14.63, -16.11 (SAP). 13.30, -2.26, -4.36, -7.26, -9.52 (TSAP).

**HRMS** (ESP $^+$ ):  $m/z$  calculated for  $\text{C}_{16}\text{H}_{24}\text{N}_4\text{O}_8\text{Eu}$   $[\text{M}+2\text{H}]^+$  : 555.0959, found: 555.0977.

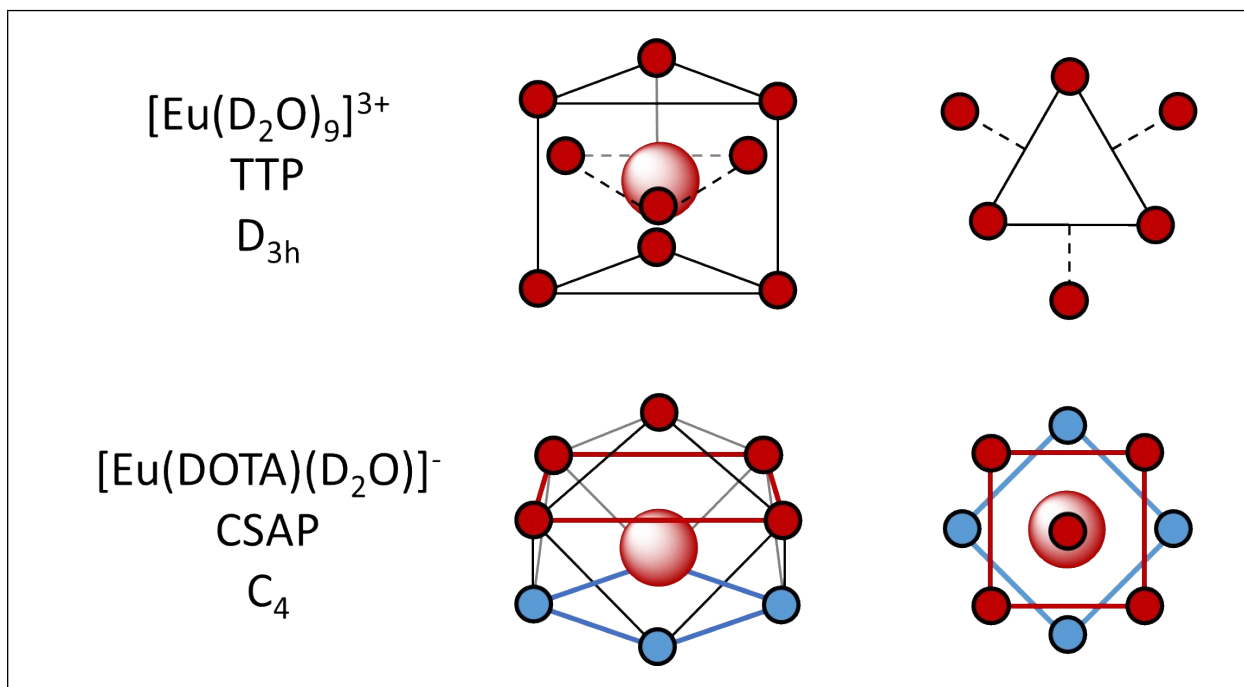

**Figure S34.** Schematic of the structure and symmetry of  $[\text{Eu}(\text{D}_2\text{O})_9]^{3+}$  (top) and  $[\text{Eu}(\text{DOTA})(\text{D}_2\text{O})]^-$  (bottom).
